# Supplementary material for: Rational steering of insulin binding specificity by intra-chain chemical crosslinking
Source: PubMed Central journal article supplement (PMC4726324; doi:10.1038/srep19431), 2016-01-21
Supplement: srep19431-s1.pdf [file srep19431-s1.pdf]

## Supplemental Information

### **Rational steering of insulin binding specificity by intra-chain chemical crosslinking**

Jitka Víková<sup>1</sup>, Michaela Collinsová<sup>1</sup>, Emília Kletvíková<sup>1</sup>, Miloš Buděšinský<sup>1</sup>, Vojtěch Kaplan<sup>1</sup>, Lenka Žáková<sup>1</sup>, Václav Veverka<sup>1</sup>, Rozálie Hexnerová<sup>1</sup>, Roberto J. Tarazona Aviñó<sup>1</sup>, Jana Straková<sup>1</sup>, Irena Selicharová<sup>1</sup>, Václav Vaněk<sup>1</sup>, Daniel W. Wright<sup>2</sup>, Christopher J. Watson<sup>2</sup>, Johan P. Turkenburg<sup>2</sup>, Andrzej M. Brzozowski<sup>2\*</sup> & Jiří Jiráček<sup>1\*</sup>

<sup>1</sup>Institute of Organic Chemistry and Biochemistry, the Czech Academy of Sciences, v.v.i., Flemingovo n. 2, 166 10 Praha 6, Czech Republic. <sup>2</sup>York Structural Biology Laboratory, Department of Chemistry, University of York, Heslington, York YO10 5DD, England. Correspondence and request for material should be addressed to J.J. (e-mail: jiracek@uochb.cas.cz) or to A.M.B. (email: marek.brzozowski@york.ac.uk)

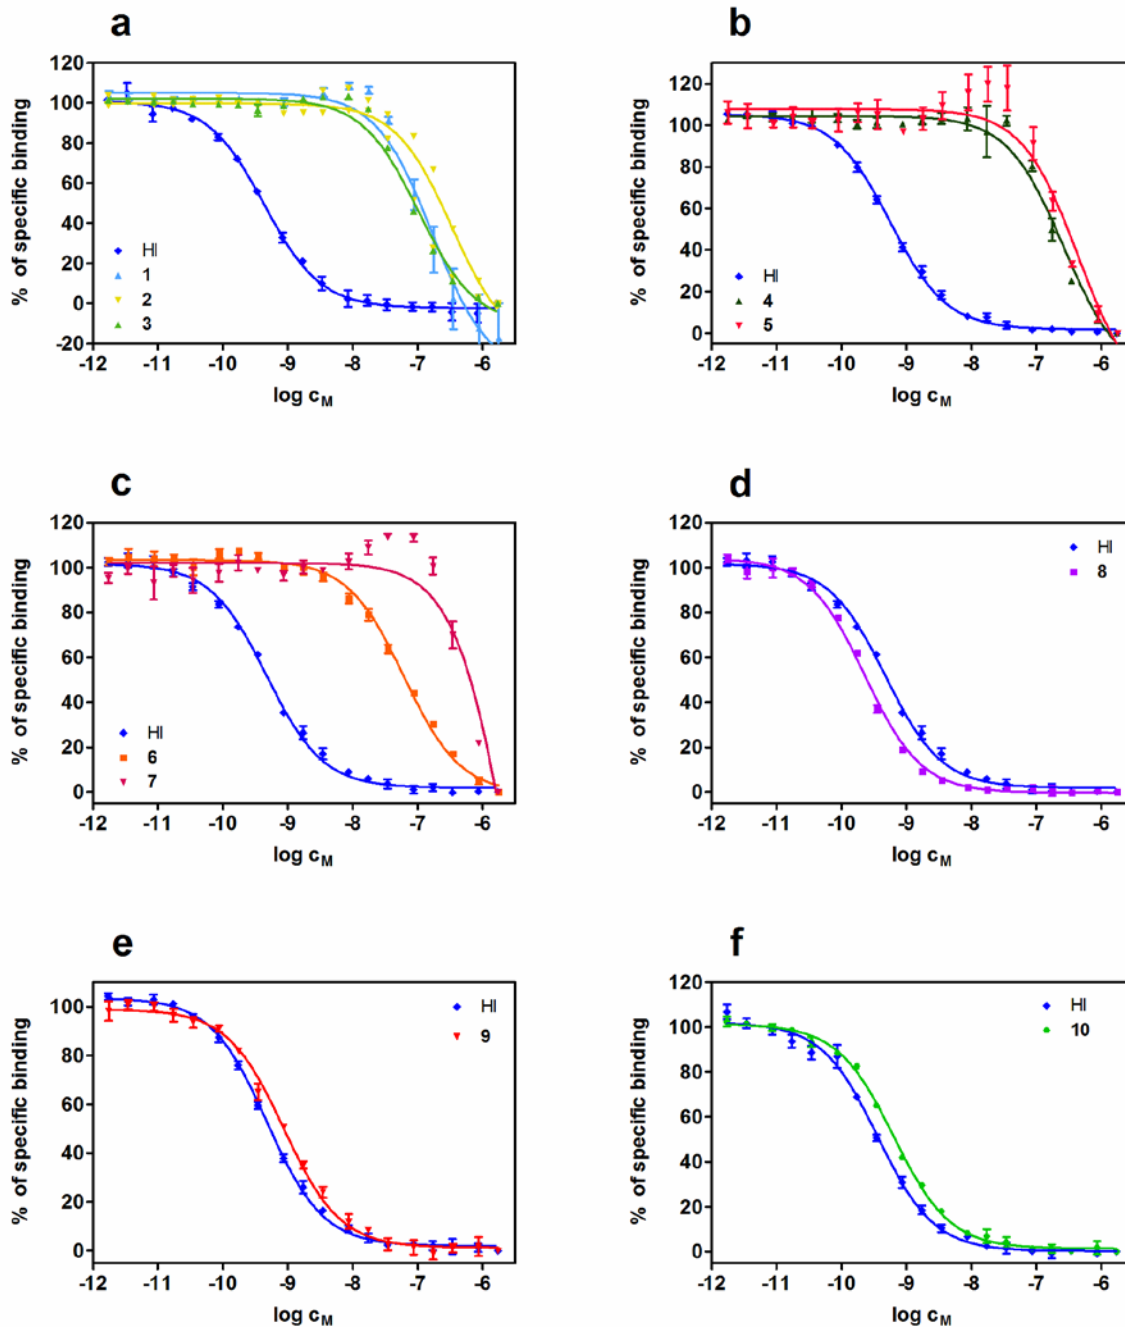

**Supplementary Figure S1. Inhibition of binding of human [<sup>125</sup>I]monoiodotyrosylA14-insulin to IR-A isoform in membranes of human IM-9 lymphocytes by human insulin and insulin analogues.** To assure the concision of the SI, only the typical, representative examples of binding curves are shown in Figures S1-S4. In all panels the binding curves of human insulin (HI) are in blue. (a) Analogue **1** (light blue), analogue **2** (yellow) and analogue **3** (green). (b) Analogue **4** (dark

green) and analogue **5** (red). (c) Analogue **6** (orange) and analogue **7** (red). (d) Analogue **8** (violet). (e) Analogue **9** (red). (f) Analogue **10** (green).

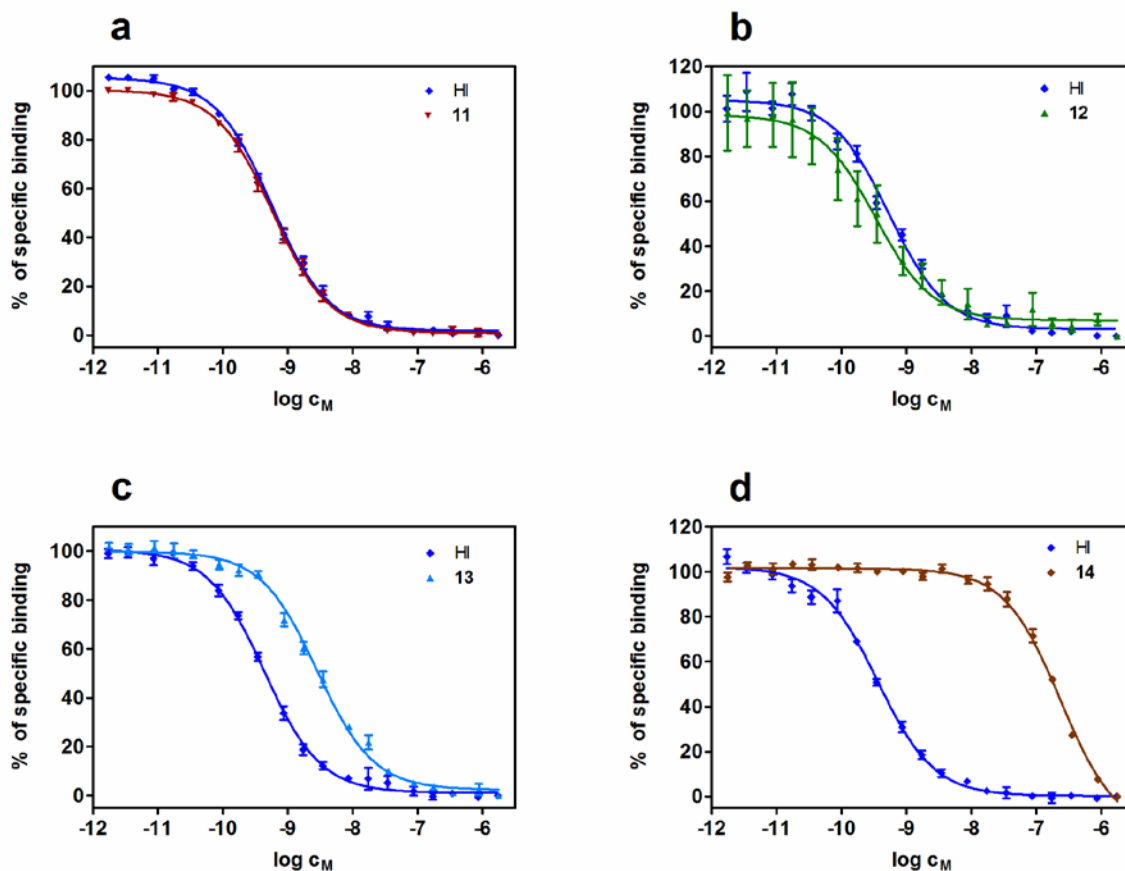

**Supplementary Figure S2. Inhibition of binding of human [<sup>125</sup>I]monoiodotyrosylA14-insulin to IR-A isoform in membranes of human IM-9 lymphocytes by human insulin and insulin analogues.** In all panels the binding curves of human insulin (HI) are in blue. (a) Analogue **11** (red). (b) Analogue **12** (green). (c) Analogue **13** (light blue). (d) Analogue **14** (brown).

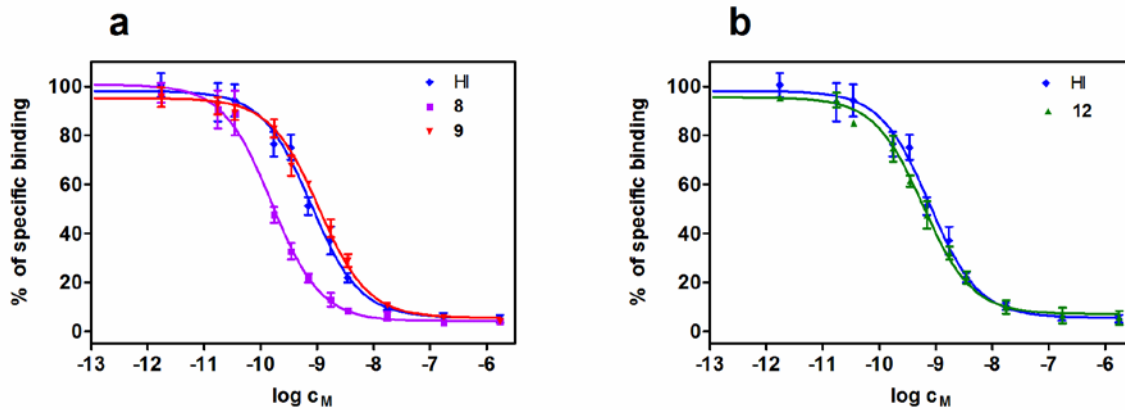

**Supplementary Figure S3. Inhibition of binding of human [ $^{125}$ I]monoiodotyrosylA14-insulin to IR-B isoform in membranes of mouse embryonic fibroblasts by human insulin and insulin analogues.** In all panels the binding curves of human insulin (HI) are in blue. (a) Analogue **8** (violet) and analogue **9** (red). (b) Analogue **12** (green).

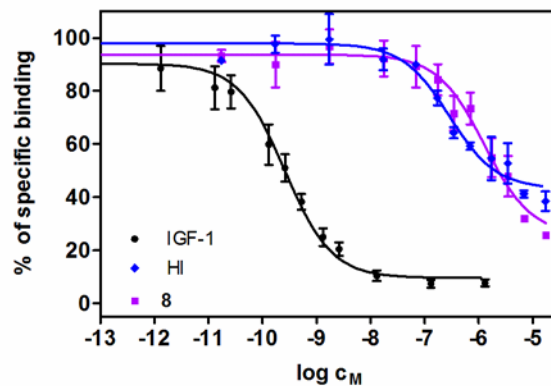

**Supplementary Figure S4. Inhibition of binding of human [ $^{125}$ I]monoiodotyrosyl-IGF-1 to IGF-1R in membranes of mouse embryonic fibroblasts by human IGF-1, human insulin and insulin analogue 8.** Human IGF-1 is in black, human insulin (HI) is in blue and analogue **8** is in violet.

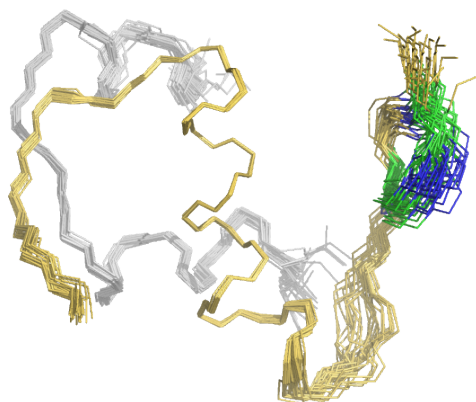

**Supplementary Figure S5. Set of converged NMR structures for analogue 12 at pH 1.9.** Insulin A chain is shown in gray, B chain is shown in yellow with the triazole cross-link at position B27-29 in green (carbon atoms) and blue (nitrogen atoms).

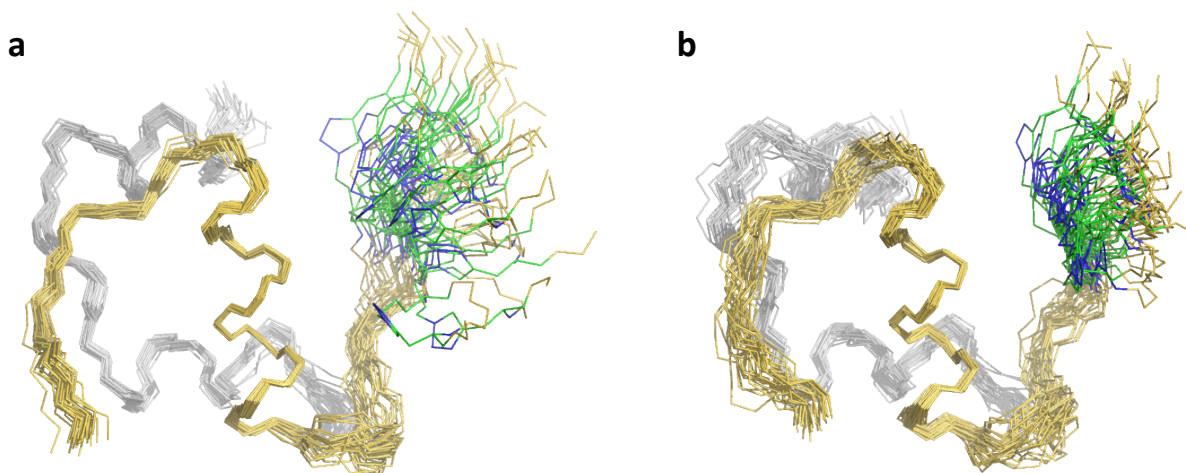

**Supplementary Figure S6. Set of converged NMR structures for analogue 8.** Set of converged NMR structures for analogue 8 at pH 1.9 (a) and pH 8.0 (b). Insulin A chain is shown in gray, B chain is shown in yellow with the triazole cross-link at position B26-29 in green (carbon atoms) and blue (nitrogen atoms).

**Supplementary Table S1. Structures of linear octapeptide precursors (1a-14a), cyclic octapeptide precursors (1b-14b) and respective resultant insulin analogues (1-14). Prg and D-Prg** are L- or D-propargylglycine, **Nle( $\epsilon$ N<sub>3</sub>)** and **D-Nle( $\epsilon$ N<sub>3</sub>)** are L- or D-azidonorleucine, respectively. **Nva( $\delta$ N<sub>3</sub>)** is L-norvaline. Other non-natural substitutions (**G** for glycine and **(NMe)A** for N-methyl-alanine incorporated to C-terminal octapeptides are shown in red. DOI is *des*(B23-B30)octapeptide-insulin.

| Code      | Schematic structure                                                                                                       | Structure |
|-----------|---------------------------------------------------------------------------------------------------------------------------|-----------|
| <b>1a</b> | $\text{G}^{\text{B}23}\text{-D-Prg-}$ $\text{FYTP-Nle}(\epsilon\text{N}_3)\text{-}$ $\text{T}^{\text{B}30}$               |           |
| <b>1b</b> | $\text{Cyclo}[\text{G}^{\text{B}23}\text{-D-}$ $\text{Prg-FYTP-}$ $\text{Nle}(\epsilon\text{N}_3)\text{-T}^{\text{B}30}]$ |           |

1

Cyclo[G<sup>B23</sup>-D-  
Prg-FYTP-  
Nle(εN<sub>3</sub>)-T<sup>B30</sup>]-  
insulin

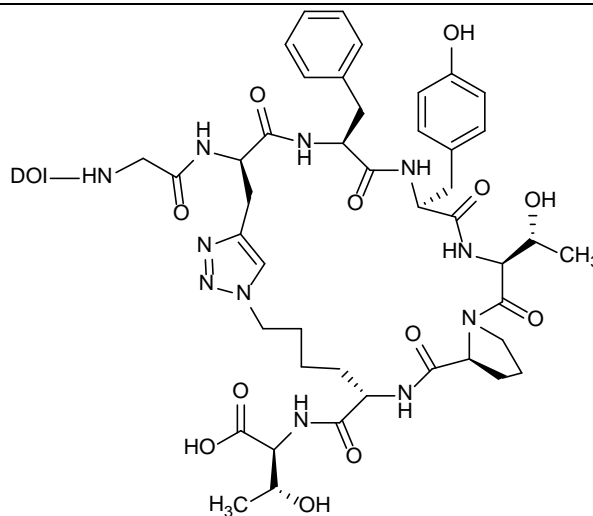

2a

G<sup>B23</sup>-Prg-FYTP-  
Nle(εN<sub>3</sub>)-T<sup>B30</sup>

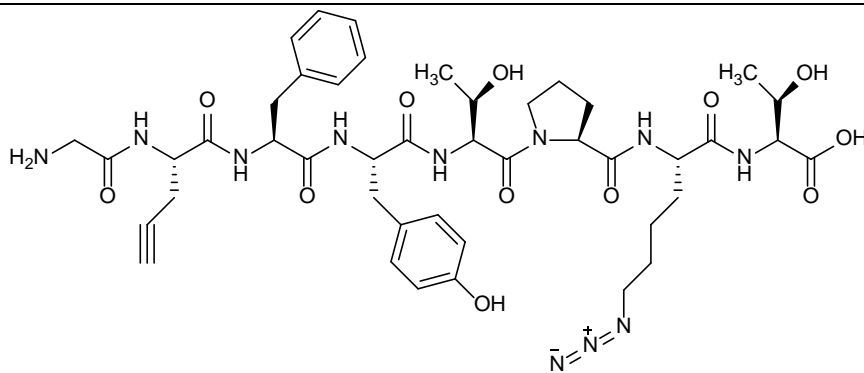

2b

Cyclo[G<sup>B23</sup>-Prg-  
FYTP-Nle(εN<sub>3</sub>)-  
T<sup>B30</sup>]

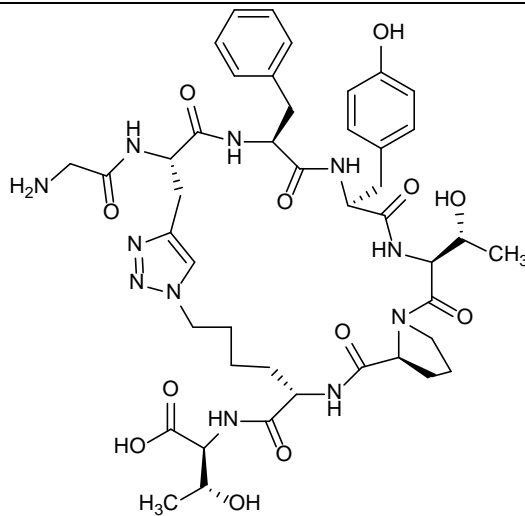

2

Cyclo[G<sup>B23</sup>-Prg-  
FYTP-Nle(εN<sub>3</sub>)-  
T<sup>B30</sup>]-insulin

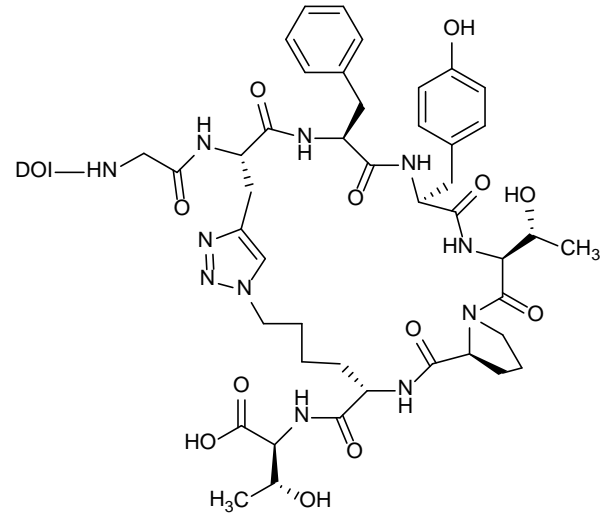

3a

G<sup>B23</sup>-D-Nle(εN<sub>3</sub>)-  
FYTP-Prg-T<sup>B30</sup>

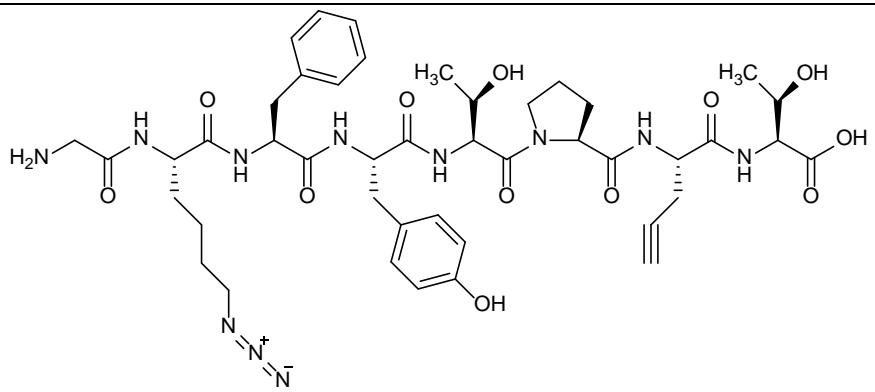

3b

Cyclo[G<sup>B23</sup>-D-  
Nle(εN<sub>3</sub>)-FYTP-  
Prg-T<sup>B30</sup>]

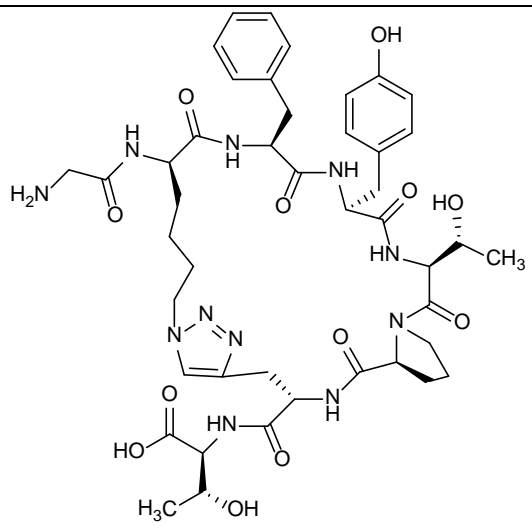



3

Cyclo[G<sup>B23</sup>-D-  
Nle(εN<sub>3</sub>)-FYTP-  
Prg-T<sup>B30</sup>]-insulin

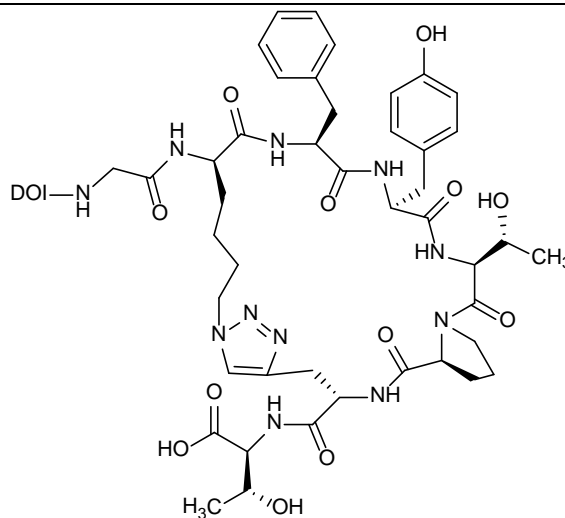

4a

G<sup>B23</sup>-D-Prg-  
FYTP-D-  
Nle(εN<sub>3</sub>)-T<sup>B30</sup>

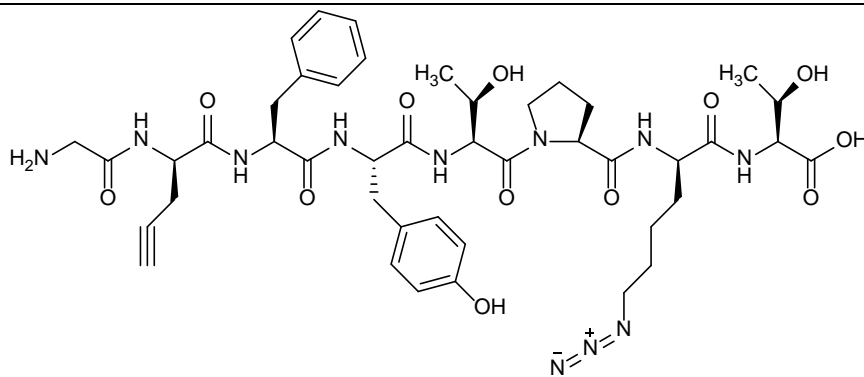

4b

Cyclo[G<sup>B23</sup>-D-  
Prg-FYTP-D-  
Nle(εN<sub>3</sub>)-T<sup>B30</sup>]

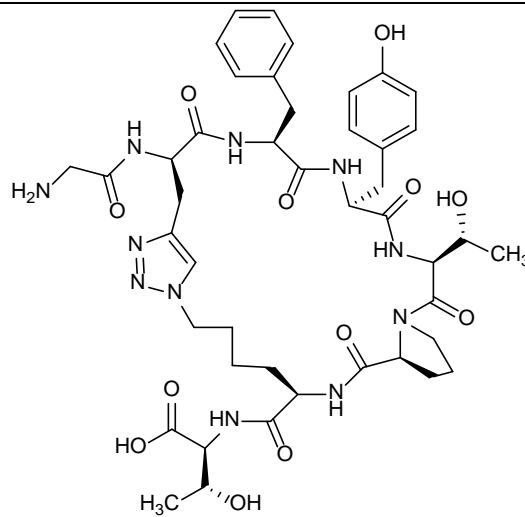

4

Cyclo[G<sup>B23</sup>-D-  
Prg-FYTP-D-  
Nle( $\epsilon$ N<sub>3</sub>)-T<sup>B30</sup>]-  
insulin

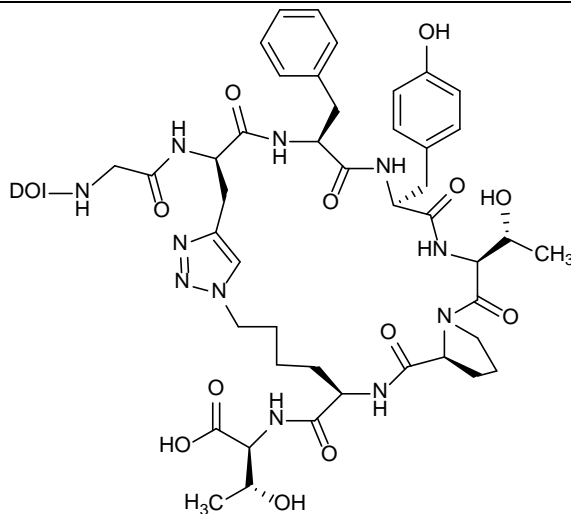

5a

G<sup>B23</sup>-D-Nle( $\epsilon$ N<sub>3</sub>)-  
FYTP-D-Prg-T<sup>B30</sup>

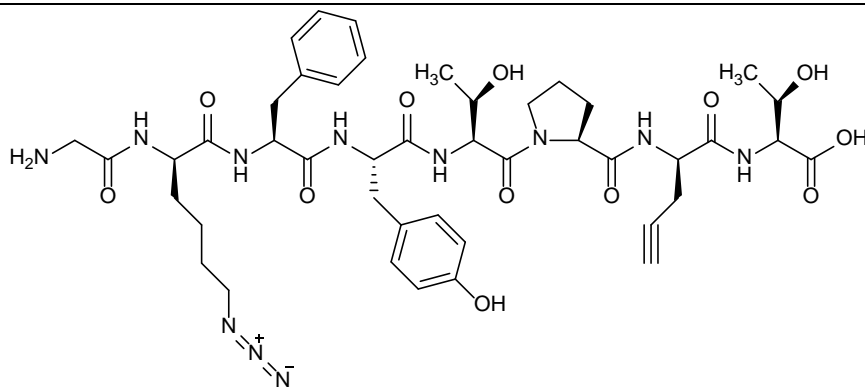

5b

Cyclo[G<sup>B23</sup>-D-  
Nle( $\epsilon$ N<sub>3</sub>)-FYTP-  
D-Prg-T<sup>B30</sup>]

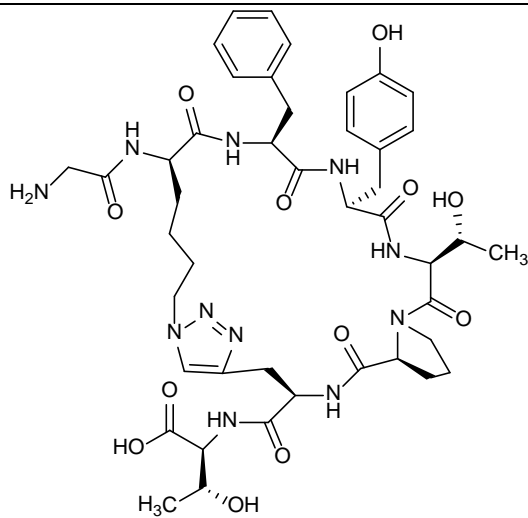

5

Cyclo[G<sup>B23</sup>-D-  
Nle(εN<sub>3</sub>)-FYTP-  
D-Prg-T<sup>B30</sup>]-  
insulin

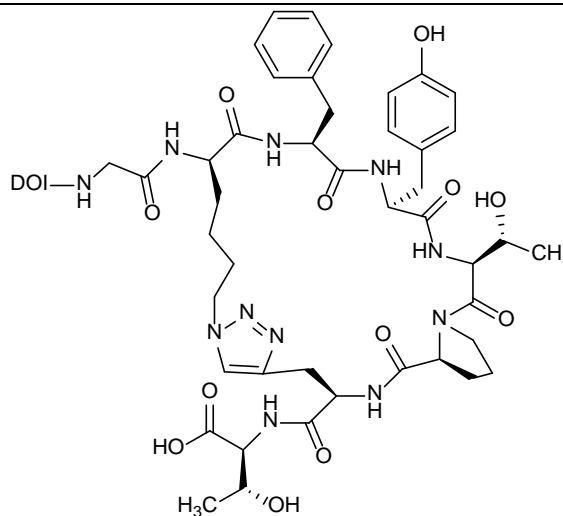

6a

G<sup>B23</sup>F-Prg-YTP-  
Nle(εN<sub>3</sub>)-T<sup>B30</sup>

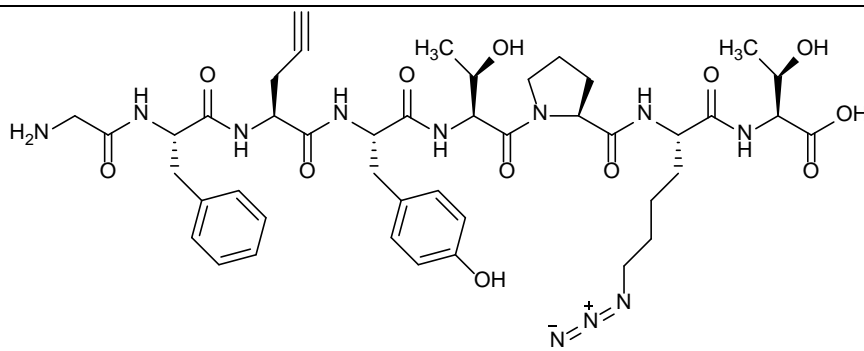

6b

Cyclo[G<sup>B23</sup>F-  
Prg-YTP-  
Nle(εN<sub>3</sub>)-T<sup>B30</sup>]

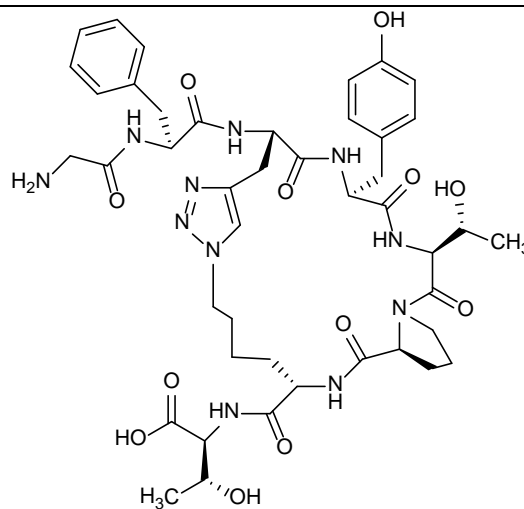

6

Cyclo[G<sup>B23</sup>F-  
Prg-YTP-  
Nle(εN<sub>3</sub>)-T<sup>B30</sup>]-  
insulin

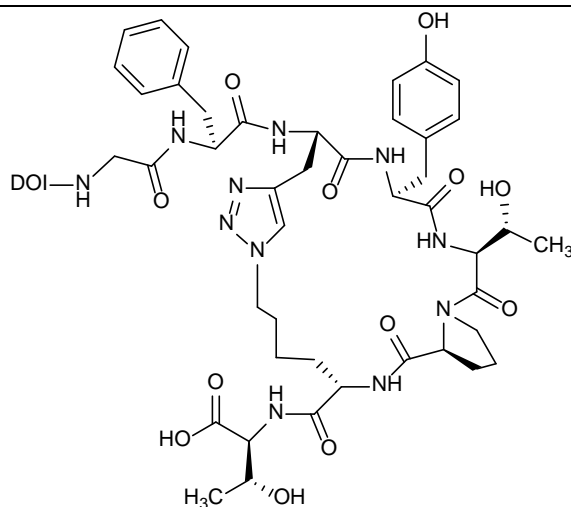

7a

G<sup>B23</sup>F-D-Prg-  
YTP-Nle(εN<sub>3</sub>)-  
T<sup>B30</sup>

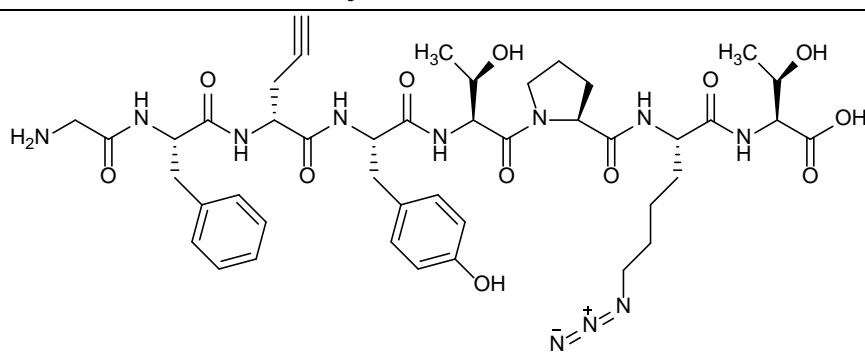

7b

Cyclo[G<sup>B23</sup>F-D-  
Prg-YTP-  
Nle(εN<sub>3</sub>)-T<sup>B30</sup>]

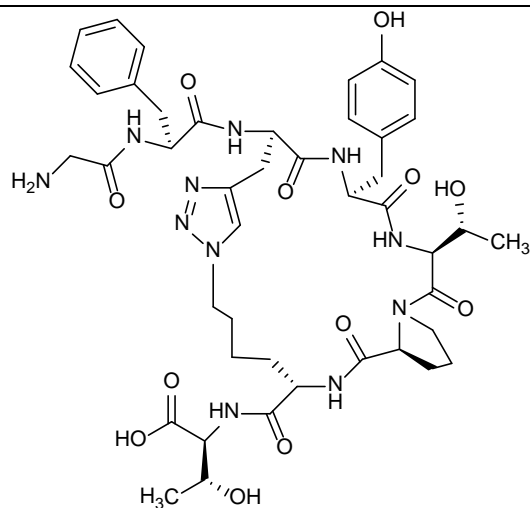

7

Cyclo[G<sup>B23</sup>F-D-  
Prg-YTP-  
Nle( $\epsilon$ N<sub>3</sub>)-T<sup>B30</sup>]-  
insulin

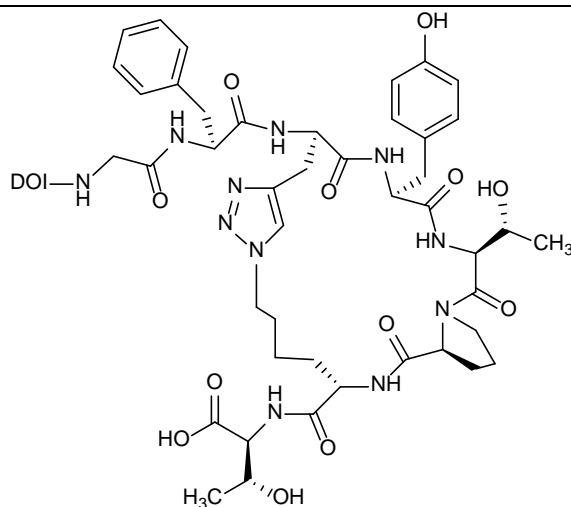

8a

G<sup>B23</sup>FF-  
Nva( $\delta$ N<sub>3</sub>)-TP-  
Prg-T<sup>B30</sup>

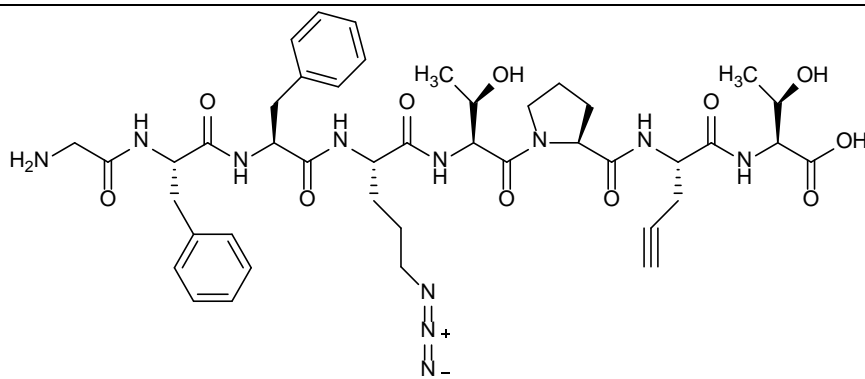

8b

Cyclo[G<sup>B23</sup>FF-  
Nva( $\delta$ N<sub>3</sub>)-TP-  
Prg-T<sup>B30</sup>]

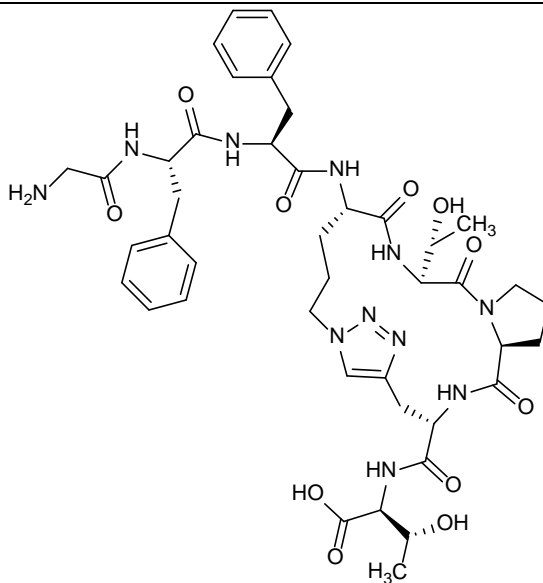

---

8

Cyclo[G<sup>B23</sup>FF-  
Nva( $\delta$ N<sub>3</sub>)-TP-  
Prg-T<sup>B30</sup>]-insulin

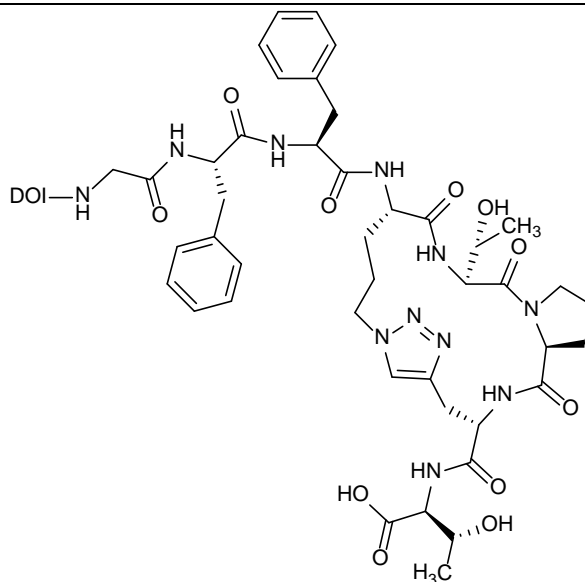

---

9a

G<sup>B23</sup>FF-Prg-TP-  
Nva( $\delta$ N<sub>3</sub>)-T<sup>B30</sup>

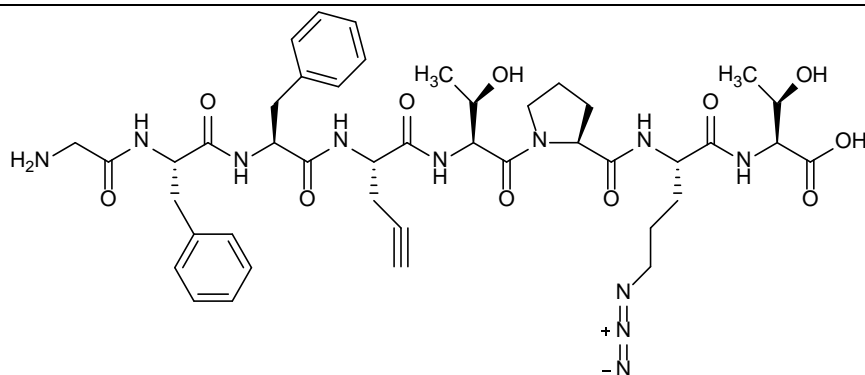

---

9b

Cyclo[G<sup>B23</sup>FF-  
Prg-TP-  
Nva( $\delta$ N<sub>3</sub>)-T<sup>B30</sup>]

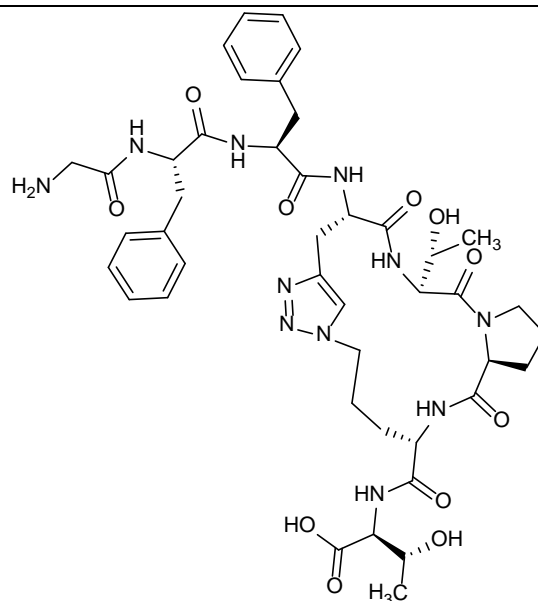

9

Cyclo[G<sup>B23</sup>FFY-  
Prg-TP-  
Nva( $\delta$ N<sub>3</sub>)-T<sup>B30</sup>]-  
insulin

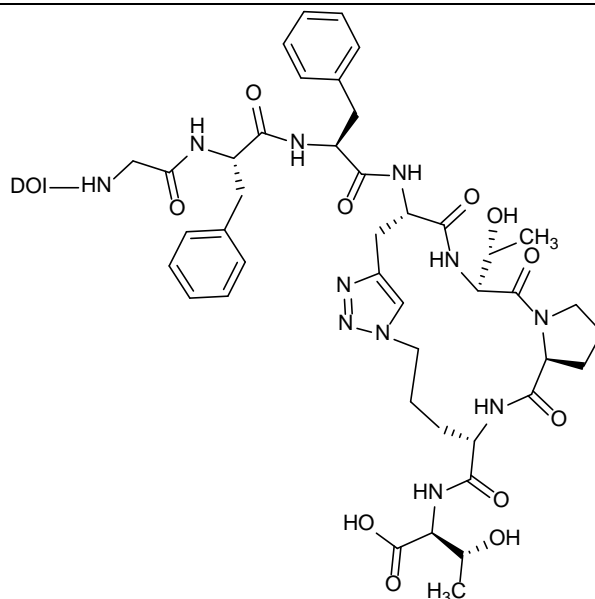

10a

G<sup>B23</sup>FFY-  
Nva( $\delta$ N<sub>3</sub>)-P-Prg-  
T<sup>B30</sup>

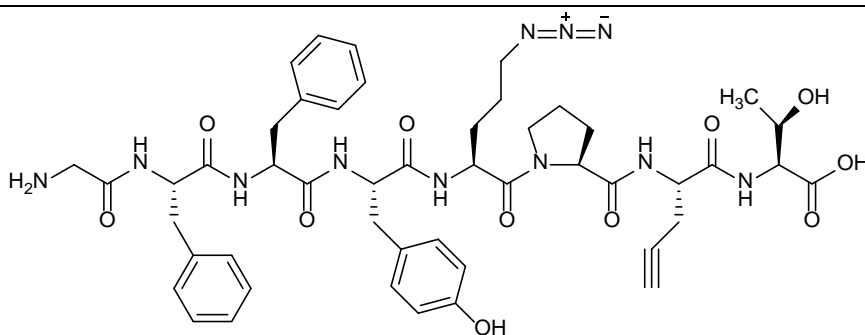

10b

Cyclo[G<sup>B23</sup>FFY-  
Nva( $\delta$ N<sub>3</sub>)-P-Prg-  
T<sup>B30</sup>]

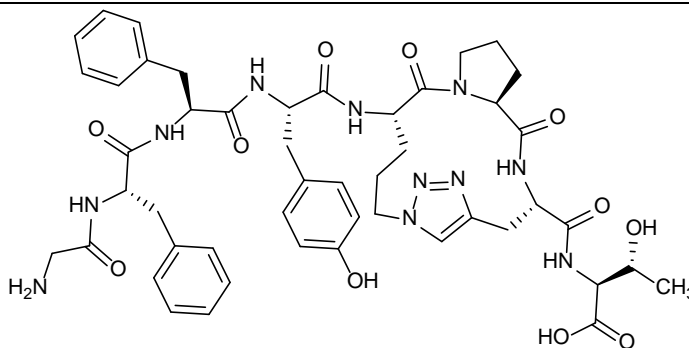

10

Cyclo[G<sup>B23</sup>FFY-  
Nva( $\delta$ N<sub>3</sub>)-P-Prg-  
T<sup>B30</sup>]-insulin

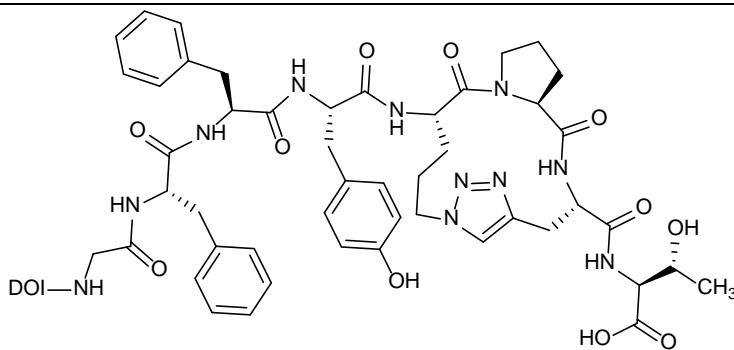





12a

$G^{B23}$ -G-FY-  
Nva( $\delta N_3$ )-P-Prg-  
T<sup>B30</sup>

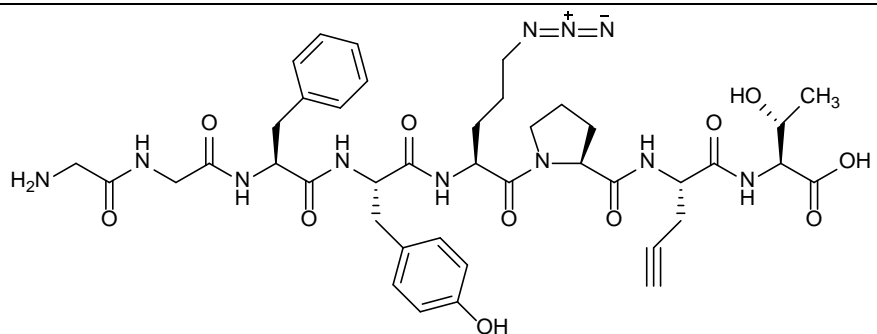

12b

Cyclo[G<sup>B23</sup>-G-  
FY-Nva( $\delta N_3$ )-P-  
Prg-T<sup>B30</sup>]

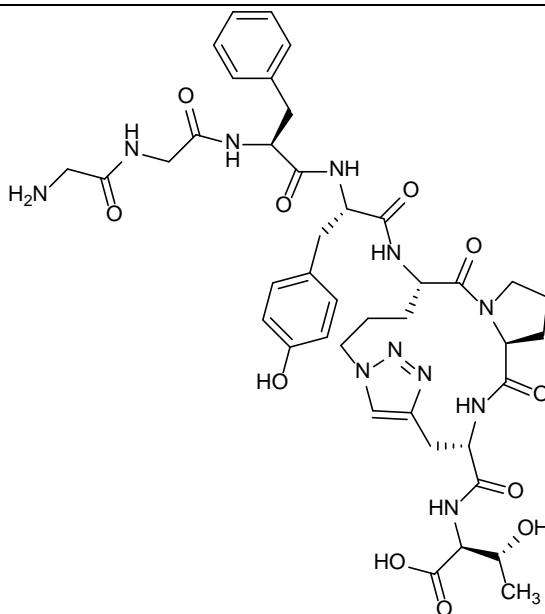

12

Cyclo[G<sup>B23</sup>-G-  
FY-Nva( $\delta N_3$ )-P-  
Prg-T<sup>B30</sup>]-insulin

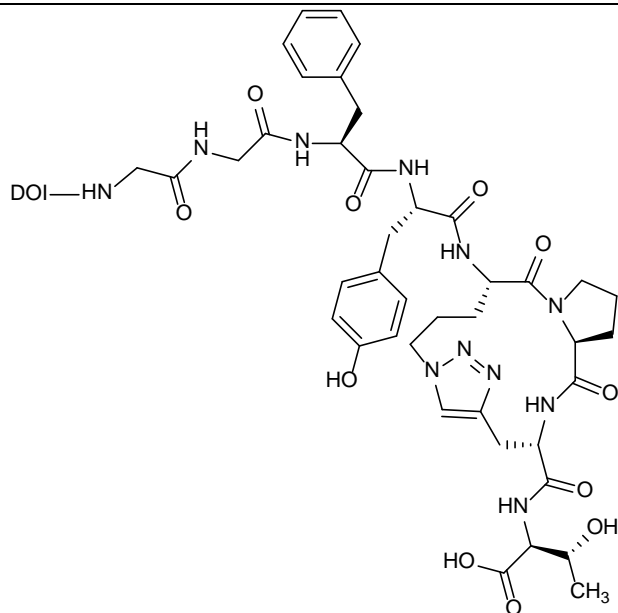



14a

$G^{B23}$ -G-F-  
(NMe)A-  
Nva( $\delta N_3$ )-P-Prg-  
T<sup>B30</sup>

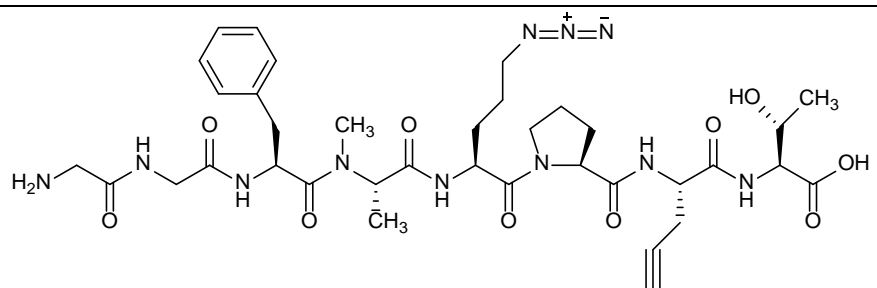

14b

Cyclo[G<sup>B23</sup>-G-F-  
(NMe)A-  
Nva( $\delta N_3$ )-P-Prg-  
T<sup>B30</sup>]

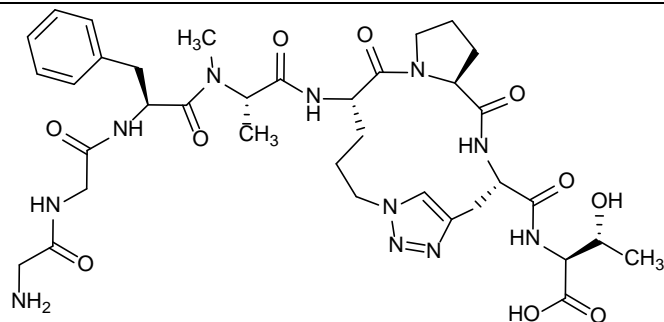

14

Cyclo[G<sup>B23</sup>-G-F-  
(NMe)A-  
Nva( $\delta N_3$ )-P-Prg-  
T<sup>B30</sup>]-insulin

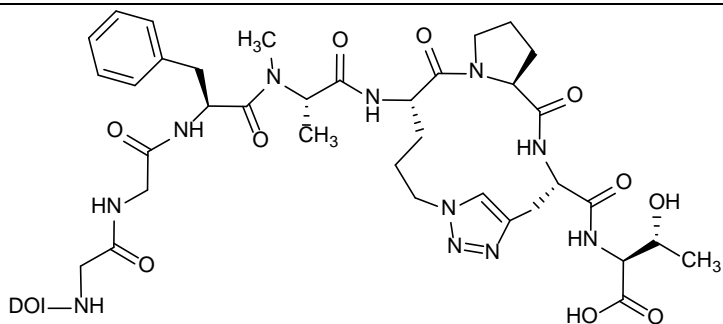

## Synthetic yields and characterization data for octapeptides and insulin analogues.

The cyclic octapeptides **1b-13b** were prepared from respective linear precursor **1a-13a** by the cycloaddition method A. The cyclic octapeptide **14b** was prepared from **14a** by the method B (see Methods in the main text).

**Linear octapeptide 1a.** The yield (RP-HPLC) was 57% (133 mg; 142  $\mu\text{mol}$ ). HRMS-ESI (m/z):  $[\text{MH}]^+$  calcd.  $\text{C}_{44}\text{H}_{60}\text{N}_{11}\text{O}_{12}$ , for 934.4417; found 934.4416.

**Cyclic octapeptide 1b.** The compound was prepared from **1a**. The yield (RP-HPLC) was 82 % (41 mg; 44  $\mu\text{mol}$ ). MS-ESI (m/z):  $[\text{MH}]^+$  calcd. for  $\text{C}_{44}\text{H}_{60}\text{N}_{11}\text{O}_{12}$  934.44; found 934.44.

**Insulin analogue 1.** Analogue **2** was prepared from DOI and **1b**. The yield (relative to DOI as the limiting compound of the reaction) after RP-HPLC purification was 4 % (1.4 mg; 0.24  $\mu\text{mol}$ ). HRMS-ESI (m/z):  $[\text{MH}]^+$  calcd. 5778.60; found 5778.60.

**Linear octapeptide 2a.** The yield (crude peptide) was cca 96% (225 mg; cca 241  $\mu\text{mol}$ ). MS-ESI (m/z):  $[\text{MH}]^+$  calcd. for  $\text{C}_{44}\text{H}_{60}\text{N}_{11}\text{O}_{12}$  934.44; found 934.44.

**Cyclic octapeptide 2b.** The compound was prepared from crude linear octapeptide **2a** (160 mg; cca 171  $\mu\text{mol}$ ). The yield (RP-HPLC) was cca 26 % (42 mg; cca 45  $\mu\text{mol}$ ). MS-ESI (m/z):  $[\text{MH}]^+$  calcd. for  $\text{C}_{44}\text{H}_{60}\text{N}_{11}\text{O}_{12}$  934.44; found 934.44.

**Insulin analogue 2.** Analogue **2** was prepared from DOI and **2b**. The yield (RP-HPLC) was 15 % (5.4 mg; 0.93  $\mu\text{mol}$ ). HRMS-ESI (m/z):  $[\text{MH}]^+$  calcd. 5778.60; found 5778.61.

**Linear octapeptide 3a.** The yield (RP-HPLC) was 33% (77 mg; 83  $\mu\text{mol}$ ). MS-ESI (m/z):  $[\text{MH}]^+$  calcd. for  $\text{C}_{44}\text{H}_{60}\text{N}_{11}\text{O}_{12}$  934.44; found 934.44.

**Cyclic octapeptide 3b.** The compound was prepared from **3a**. The yield (RP-HPLC) was 88 % (44 mg; 47  $\mu\text{mol}$ ). MS-ESI (m/z):  $[\text{MH}]^+$  calcd. for  $\text{C}_{44}\text{H}_{60}\text{N}_{11}\text{O}_{12}$  934.44; found 934.44.

**Insulin analogue 3.** Analogue **3** was prepared from DOI and **3b**. The yield (RP-HPLC) was 5 % (1.8 mg; 0.31  $\mu\text{mol}$ ). HRMS-ESI (m/z):  $[\text{MH}]^+$  calcd. 5778.60; found 5778.61.

**Linear octapeptide 4a.** The yield (RP-HPLC) was 55% (129 mg; 138  $\mu\text{mol}$ ). MS-ESI (m/z):  $[\text{MH}]^+$  calcd. for  $\text{C}_{44}\text{H}_{60}\text{N}_{11}\text{O}_{12}$  934.44; found 934.44.

**Cyclic octapeptide 4b.** The compound was prepared from **4a**. The yield (RP-HPLC) was 62 % (31 mg; 33  $\mu\text{mol}$ ). MS-ESI (m/z):  $[\text{MH}]^+$  calcd. for  $\text{C}_{44}\text{H}_{60}\text{N}_{11}\text{O}_{12}$  934.44; found 934.44.

**Insulin analogue 4.** Analogue **4** was prepared from DOI and **4b**. The yield (RP-HPLC) was 8 % (2.6 mg; 0.45  $\mu$ mol). HRMS-ESI (m/z): [MH]<sup>+</sup> calcd. 5778.60; found 5778.62.

**Linear octapeptide 5a.** The yield (RP-HPLC) was 60% (140 mg; 150  $\mu$ mol). MS-ESI (m/z): [MH]<sup>+</sup> calcd. for C<sub>44</sub>H<sub>60</sub>N<sub>11</sub>O<sub>12</sub> 934.44; found 934.44.

**Cyclic octapeptide 5b.** The compound was prepared from **5a**. The yield (RP-HPLC) was 62 % (31 mg; 33  $\mu$ mol). MS-ESI (m/z): [MH]<sup>+</sup>calcd. for C<sub>44</sub>H<sub>60</sub>N<sub>11</sub>O<sub>12</sub> 934.44; found 934.44.

**Insulin analogue 5.** Analogue **5** was prepared from DOI and **5b**. The yield (RP-HPLC) was 5 % (1.8 mg; 0.31  $\mu$ mol). HRMS-ESI (m/z): [MH]<sup>+</sup> calcd. 5778.60; found 5778.61.

**Linear octapeptide 6a.** The yield (RP-HPLC) was 47% (109 mg; 117  $\mu$ mol). HRMS-ESI (m/z): [MH]<sup>+</sup> calcd. for C<sub>44</sub>H<sub>60</sub>N<sub>11</sub>O<sub>12</sub> 934.4417; found 934.4409, [MNa]<sup>+</sup> calcd. for C<sub>44</sub>H<sub>59</sub>N<sub>11</sub>O<sub>12</sub>Na 956.4237; found 956.4228.

**Cyclic octapeptide 6b.** The compound was prepared from **6a**. The yield (RP-HPLC) was 74 % (37 mg; 33  $\mu$ mol). HRMS-ESI (m/z): [MH]<sup>+</sup> calcd for C<sub>44</sub>H<sub>60</sub>N<sub>11</sub>O<sub>12</sub> 934.4417; found 934.4429, [MNa]<sup>+</sup> calcd for C<sub>44</sub>H<sub>59</sub>N<sub>11</sub>O<sub>12</sub>Na 956.4237; found 956.4247.

**Insulin analogue 6.** The analogue **6** was prepared from DOI and **6b**. The yield (RP-HPLC) purification was 7 % (2.3 mg; 0.40  $\mu$ mol). HRMS-ESI (m/z): [MH]<sup>+</sup> calcd. 5778.60; found 5778.60.

**Linear octapeptide 7a.** The yield (RP-HPLC) was 37% (86 mg; 92  $\mu$ mol). HRMS-ESI (m/z): [MH]<sup>+</sup> calcd. for 934.4417 C<sub>44</sub>H<sub>60</sub>N<sub>11</sub>O<sub>12</sub>; found 934.4403.

**Cyclic octapeptide 7b.** The compound was prepared from **7a**. The yield (RP-HPLC) was 74 % (37 mg; 33  $\mu$ mol). HRMS-ESI (m/z): [MH]<sup>+</sup> calcd. for C<sub>44</sub>H<sub>60</sub>N<sub>11</sub>O<sub>12</sub> 934.4417; found 934.4423.

**Insulin analogue 7.** The analogue **7** was prepared from DOI and **7b**. The yield (RP-HPLC) was 30 % (10 mg; 1.73  $\mu$ mol). HRMS-ESI (m/z): [MH]<sup>+</sup> calcd. 5778.60, found 5778.60.

**Linear octapeptide 8a.** The yield (RP-HPLC) was 63% (143 mg; 158  $\mu$ mol). HRMS-ESI (m/z): [MH]<sup>+</sup> calcd. for C<sub>43</sub>H<sub>58</sub>N<sub>11</sub>O<sub>11</sub> 904.4312; found 904.4318.

**Cyclic octapeptide 8b.** The compound was prepared from **8a**. The yield (RP-HPLC) was 40 % (20 mg; 22  $\mu$ mol). HRMS-ESI (m/z): [MH]<sup>+</sup> calcd. for C<sub>43</sub>H<sub>58</sub>N<sub>11</sub>O<sub>11</sub> 904.4312; found 904.4317.

**Insulin analogue 8.** Analogue **8** was prepared from DOI and **8b**. The yield (RP-HPLC) was 9.8 % (2.4 mg; 0.42  $\mu$ mol). HRMS-ESI (m/z): [MH]<sup>+</sup> calcd. 5748.59; found 5748.59.

**Linear octapeptide 9a.** The yield (RP-HPLC) was 48% (109 mg; 120  $\mu\text{mol}$ ). HRMS-ESI (m/z):  $[\text{MH}]^+$  calcd. for  $\text{C}_{43}\text{H}_{58}\text{N}_{11}\text{O}_{11}$  904.4312; found 904.4317.

**Cyclic octapeptide 9b.** The compound was prepared from **9a**. The yield (RP-HPLC) was 45 % (23 mg; 25  $\mu\text{mol}$ ). HRMS-ESI (m/z):  $[\text{MH}]^+$  calcd. for  $\text{C}_{43}\text{H}_{58}\text{N}_{11}\text{O}_{11}$  904.4312; found 904.4316.

**Insulin analogue 9.** Analogue **9** was prepared from DOI and **9b**. The yield (RP-HPLC) was 9.8 % (2.9 mg; 0.51  $\mu\text{mol}$ ). HRMS-ESI (m/z):  $[\text{MH}]^+$  calcd. 5748.59; found 5748.59.

**Linear octapeptide 10a.** The yield (crude peptide) was cca 72% (175 mg; cca 181  $\mu\text{mol}$ ). HR-ESI (m/z):  $[\text{MH}]^+$  calcd. for  $\text{C}_{48}\text{H}_{60}\text{N}_{11}\text{O}_{11}$  966.4468; found 966.4467.

**Cyclic octapeptide 10b.** The compound was prepared from 160 mg (cca 166  $\mu\text{mol}$ ) of crude linear octapeptide **10a**. The yield (RP-HPLC) was cca 37 % (60 mg; cca 62  $\mu\text{mol}$ ). HRMS-ESI (m/z):  $[\text{MH}]^+$  calcd. for  $\text{C}_{43}\text{H}_{58}\text{N}_{11}\text{O}_{11}$  966.4468; found 966.4469.

**Insulin analogue 10.** Analogue **10** was prepared from DOI and **10b**. The yield (RP-HPLC) was 13 % (2.4 mg; 0.41  $\mu\text{mol}$ ). HR-ESI  $[\text{MH}]^+$  calculated 5810.61, found 5810.62.

**Linear octapeptide 11a.** The yield (RP-HPLC) was 33% (77 mg; 120  $\mu\text{mol}$ ). MS-ESI (m/z):  $[\text{MH}]^+$  calcd. for  $\text{C}_{46}\text{H}_{56}\text{N}_{11}\text{O}_{10}$  922.42; found 922.42.

**Cyclic octapeptide 11b.** The compound was prepared from **11a**. The yield (RP-HPLC) was 50 % (25 mg; 27  $\mu\text{mol}$ ). MS-ESI (m/z):  $[\text{MH}]^+$  calcd. for  $\text{C}_{46}\text{H}_{56}\text{N}_{11}\text{O}_{10}$  922.42; found 922.42.

**Insulin analogue 11.** Analogue **11** was prepared from DOI and **11b**. The yield (RP-HPLC) was 14 % (4.9 mg; 0.84  $\mu\text{mol}$ ). HRMS-ESI  $[\text{MH}]^+$  calcd. 5766.58; found 5766.58.

**Linear octapeptide 12a.** The yield (RP-HPLC) was 45% (99 mg; 113  $\mu\text{mol}$ ). HRMS-ESI (m/z):  $[\text{MH}]^+$  calcd. for  $\text{C}_{41}\text{H}_{54}\text{N}_{11}\text{O}_{11}$  876.4004; found 876.4004,  $[\text{MNa}]^+$  calcd. for  $\text{C}_{41}\text{H}_{53}\text{N}_{11}\text{O}_{11}\text{Na}$  898.3824; found 898.3818.

**Cyclic octapeptide 12b.** The compound was prepared from **12a**. The yield (RP-HPLC) was 52 % (26 mg; 30  $\mu\text{mol}$ ). HRMS-ESI (m/z):  $[\text{MH}]^+$  calcd. for  $\text{C}_{41}\text{H}_{54}\text{N}_{11}\text{O}_{11}$  876.4004; found 876.4004,  $[\text{MNa}]^+$  calcd. for  $\text{C}_{41}\text{H}_{53}\text{N}_{11}\text{O}_{11}\text{Na}$  898.3824; found 898.3818.

**Insulin analogue 12.** Analogue **12** was prepared from DOI and **12b**. The yield (RP-HPLC) was 5 % (1.7 mg; 0.30  $\mu\text{mol}$ ). HRMS-ESI (m/z):  $[\text{MH}]^+$  calcd. 5720.56; found 5720.57.

**Linear octapeptide 13a.** The yield (RP-HPLC) was 26 % (52 mg; 64  $\mu\text{mol}$ ). HRMS-ESI (m/z):  $[\text{MH}]^+$  calcd. for  $\text{C}_{36}\text{H}_{52}\text{N}_{11}\text{O}_{11}$  814.3848; found 814.3838.

**Cyclic octapeptide 13b.** The compound was prepared from **13a**. The yield (RP-HPLC) was 36 % (18 mg; 22  $\mu$ mol). MS-ESI (m/z):  $[\text{MH}]^+$  calcd. for  $\text{C}_{36}\text{H}_{52}\text{N}_{11}\text{O}_{11}$  814.38; found 814.38.

**Insulin analogue 13.** Analogue **13** was prepared from DOI and **13b**. The yield (RP-HPLC) was 17 % (4.4 mg; 0.77  $\mu$ mol). HRMS -ESI (m/z):  $[\text{MH}]^+$  calcd. 5658.55; found 5658.55.

**Linear octapeptide 14a.** The yield (RP-HPLC) was 46 % (91 mg; 114  $\mu$ mol). HRMS-ESI (m/z):  $[\text{MH}]^+$  calcd. for  $\text{C}_{36}\text{H}_{52}\text{N}_{11}\text{O}_{10}$  798.3899; found 798.3893.

**Cyclic octapeptide 14b.** The compound was prepared from **14a**. The yield (RP-HPLC) was 49 % (25 mg; 31  $\mu$ mol). HRMS-ESI (m/z):  $[\text{MH}]^+$  calcd. for  $\text{C}_{36}\text{H}_{52}\text{N}_{11}\text{O}_{10}$  798.3899; found 798.3887.

**Insulin analogue 14.** Analogue **14** was prepared from DOI and **14b**. The yield (RP-HPLC) was 18 % (5.6 mg; 0.99  $\mu$ mol). HRMS-ESI (m/z):  $[\text{MH}]^+$  calcd. 5642.55; found 5642.55.

### **HPLC purification of octapeptides and insulin analogues.**

Except octapeptides **2a** and **10a**, which were sufficiently pure in their crude forms, all the linear and cyclic octapeptides were purified using reversed-phase high-performance liquid chromatography (RP-HPLC) on Nucleosil C18 column (250 mm  $\times$  21 mm, 5  $\mu$ m), at 9 ml/min, in a gradient of acetonitrile in water supplemented with 0.1% (v/v) TFA.

Target insulin analogues **1-14** were purified on Nucleosil C18 column (250 mm  $\times$  8 mm, 5  $\mu$ m), at 3 ml/min, using a following gradient of acetonitrile (ACN) in water (v/v) supplemented with 0.1% (v/v) TFA: 0 min/8% ACN, 1 min/28% ACN, 21 min/36% ACN, 34 min/44% ACN, 36-37 min/72% ACN, 37.1 min/8% ACN.

The purity of analogues **1-14** was controlled by RP-HPLC on Nucleosil C18 column (250 mm  $\times$  4 mm, 5  $\mu$ m) using the same gradient as above but at 1 ml/min. The absorbance was monitored at 218 nm. The RP-HPLC chromatograms of analogues **1-14** are shown in Figures S7-S20.

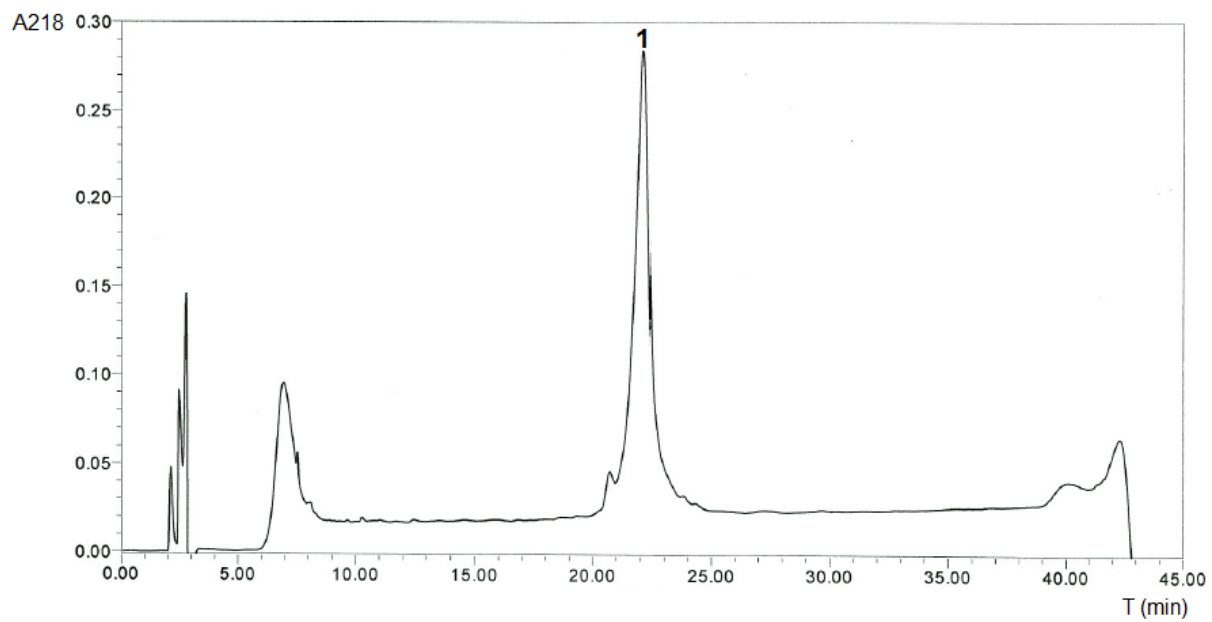

**Figure S7.** RP-HPLC analysis of analogue 1. The peak of the compound is marked by 1.

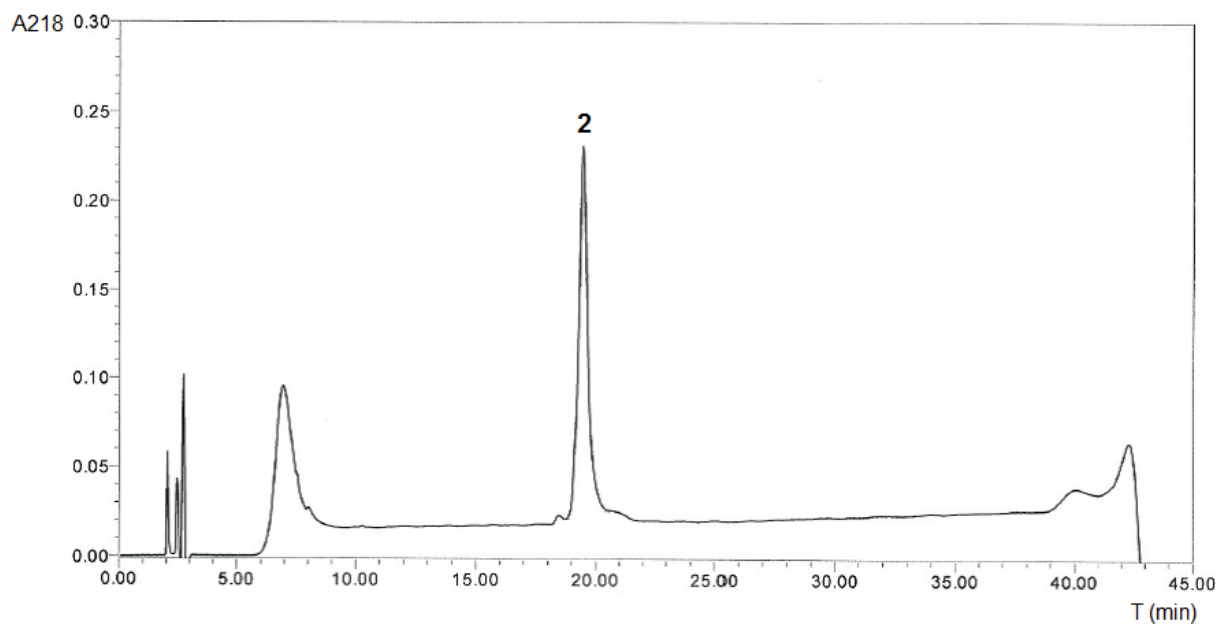

**Figure S8.** RP-HPLC analysis of analogue 2. The peak of the compound is marked by 2.



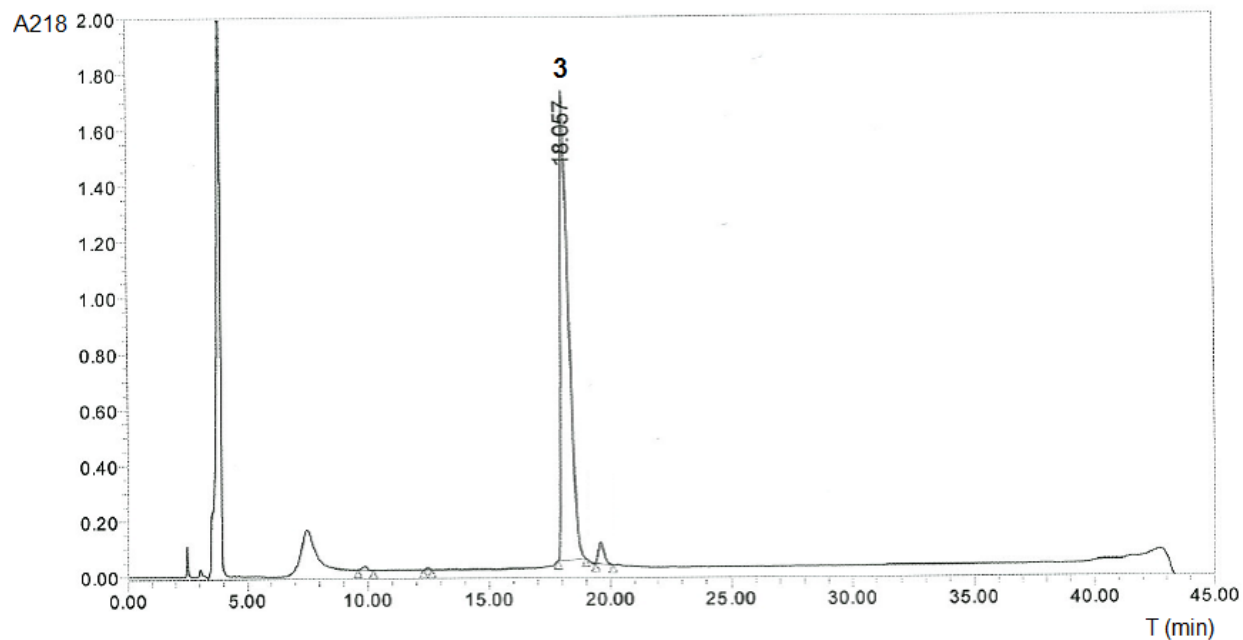

**Figure S9. RP-HPLC analysis of analogue 3.** The peak of the compound is marked by 3.

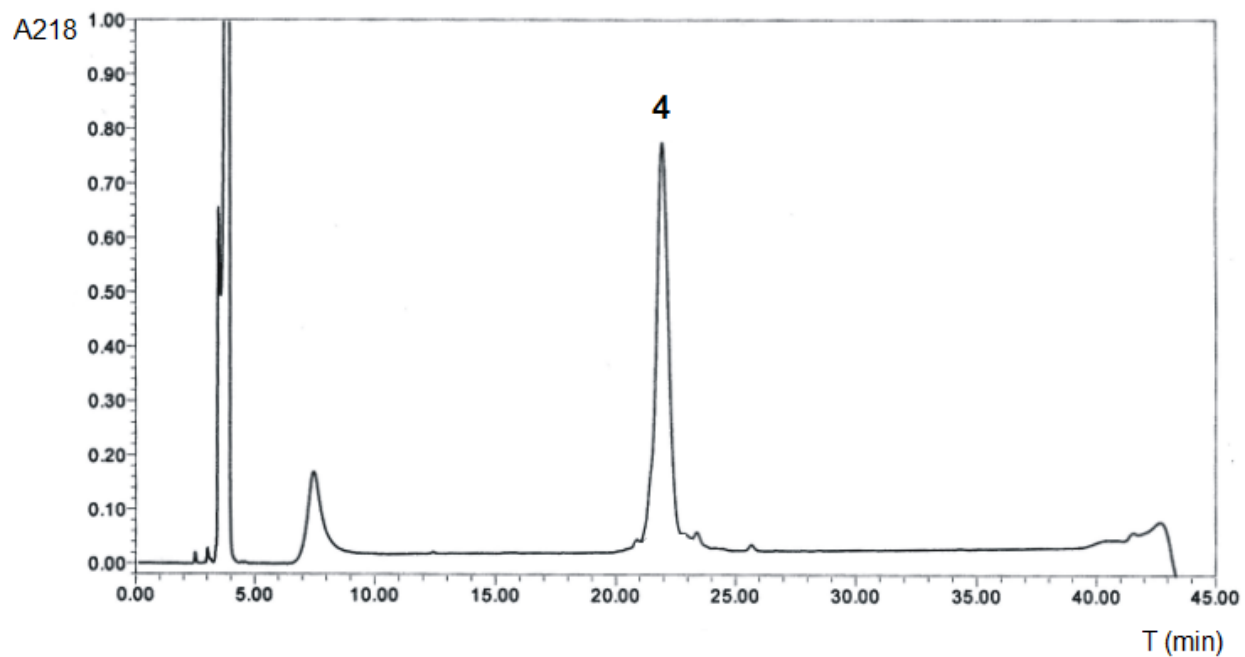

**Figure S10. RP-HPLC analysis of analogue 4.** The peak of the compound is marked by 4.

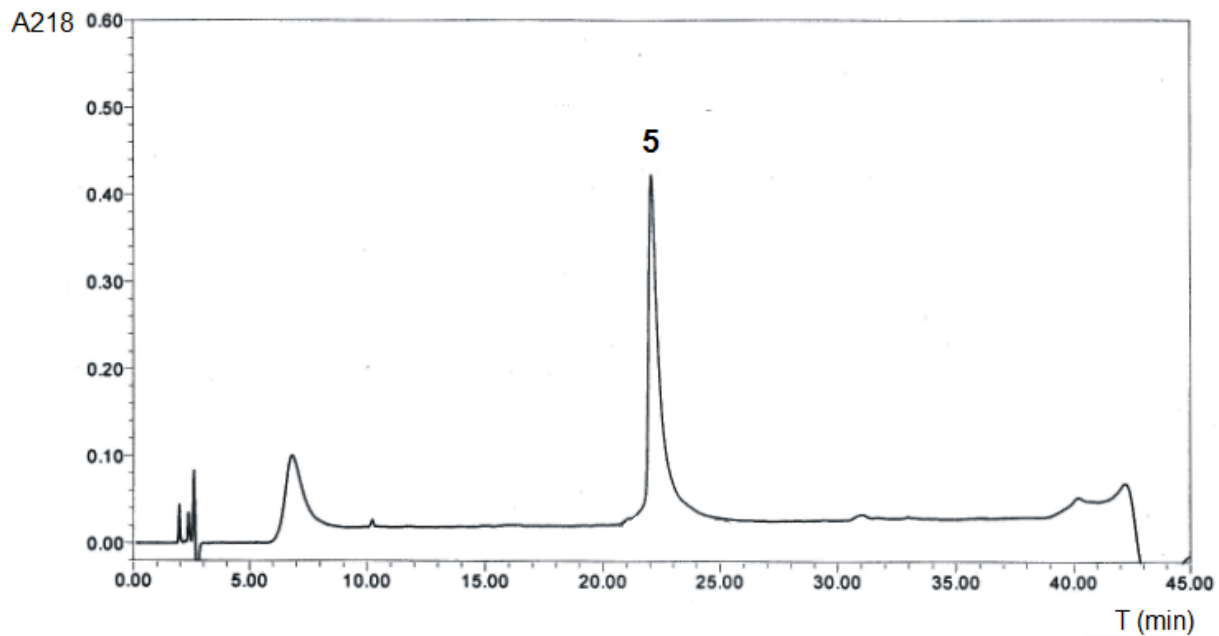

**Figure S11. RP-HPLC analysis of analogue 5. The peak of the compound is marked by 5.**

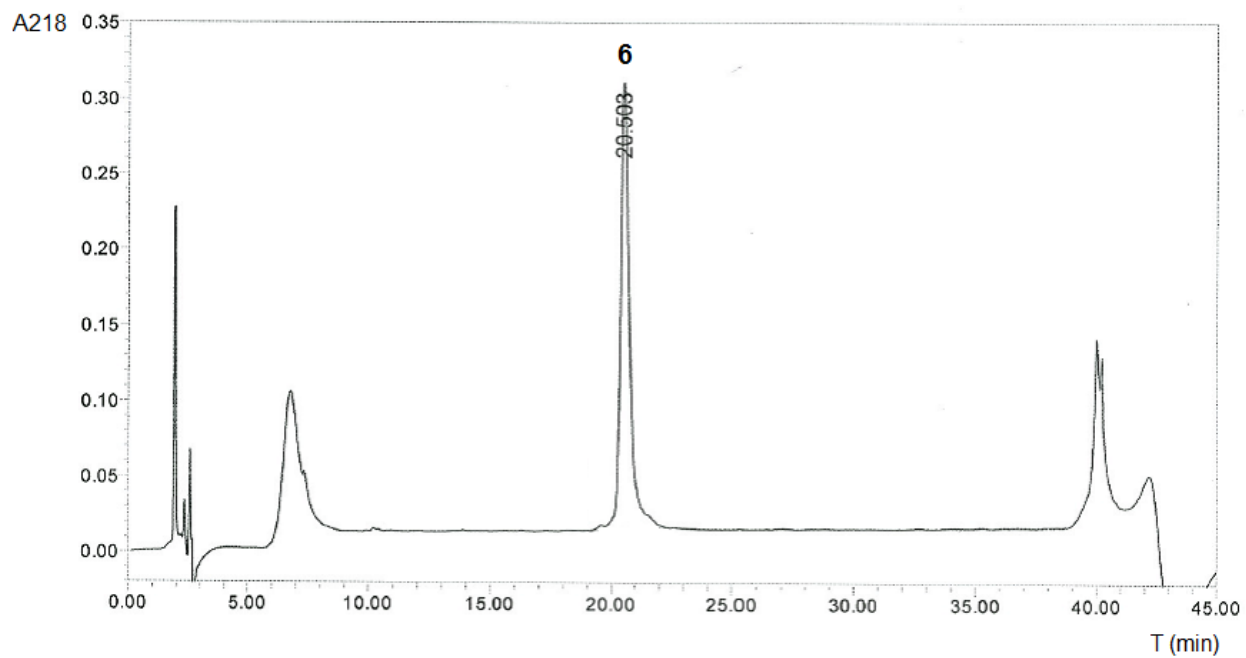

**Figure S12. RP-HPLC analysis of analogue 6. The peak of the compound is marked by 6.**

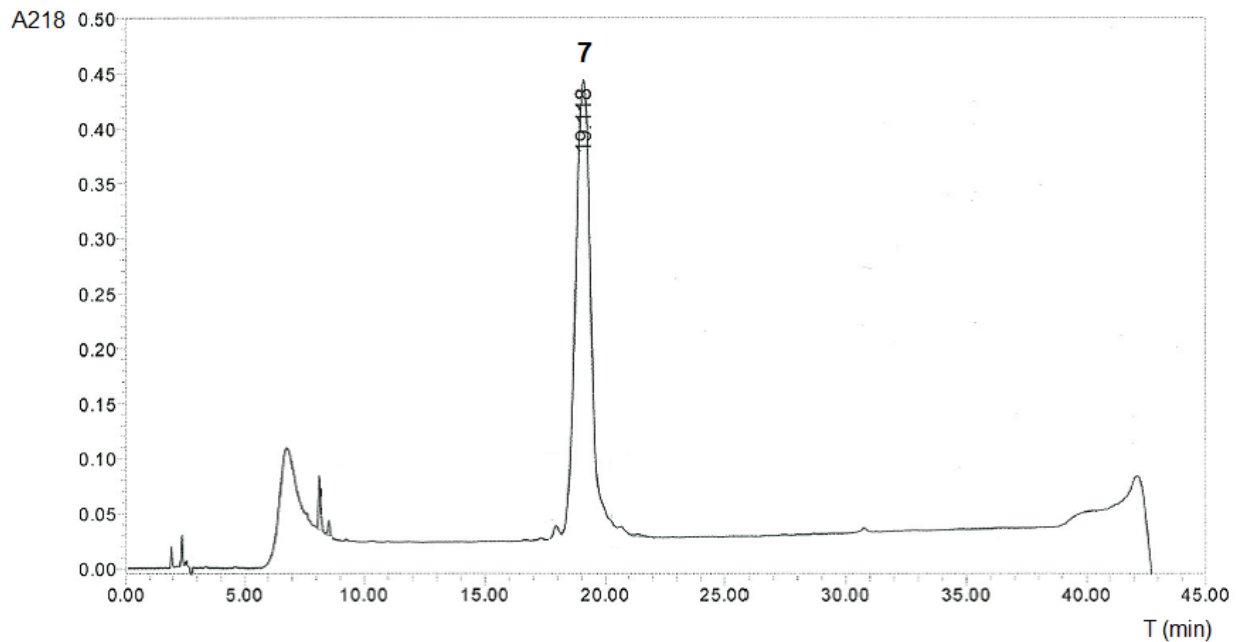

**Figure S13. RP-HPLC analysis of analogue 7. The peak of the compound is marked by 7.**

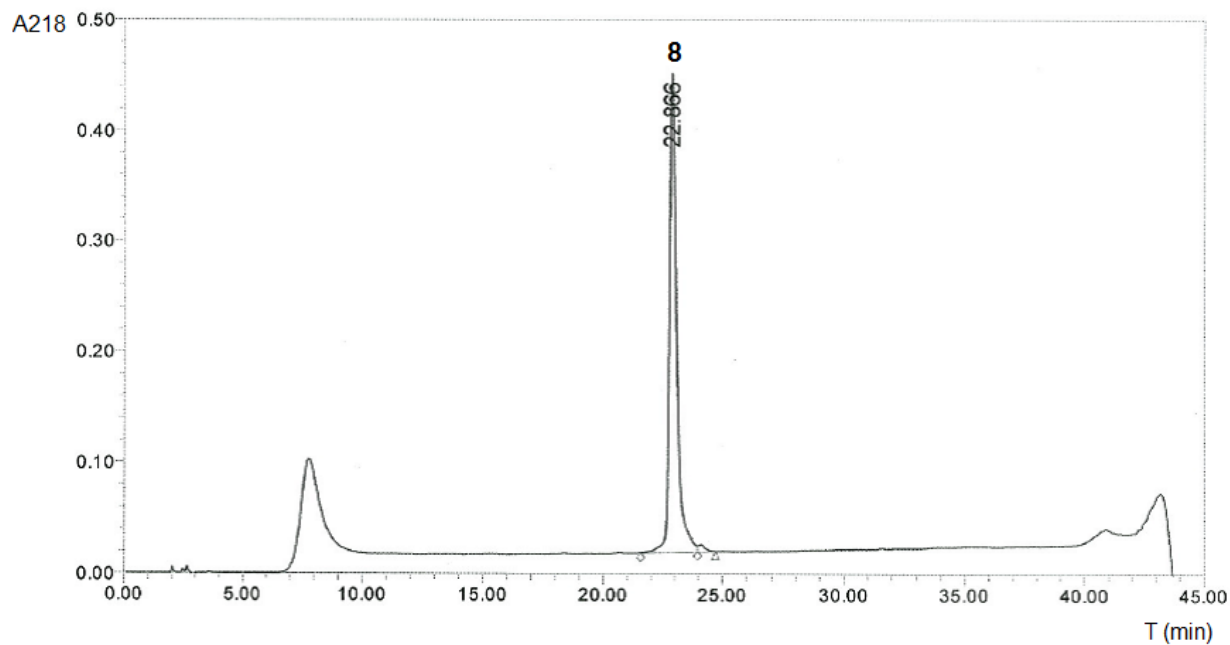

**Figure S14. RP-HPLC analysis of analogue 8. The peak of the compound is marked by 8.**

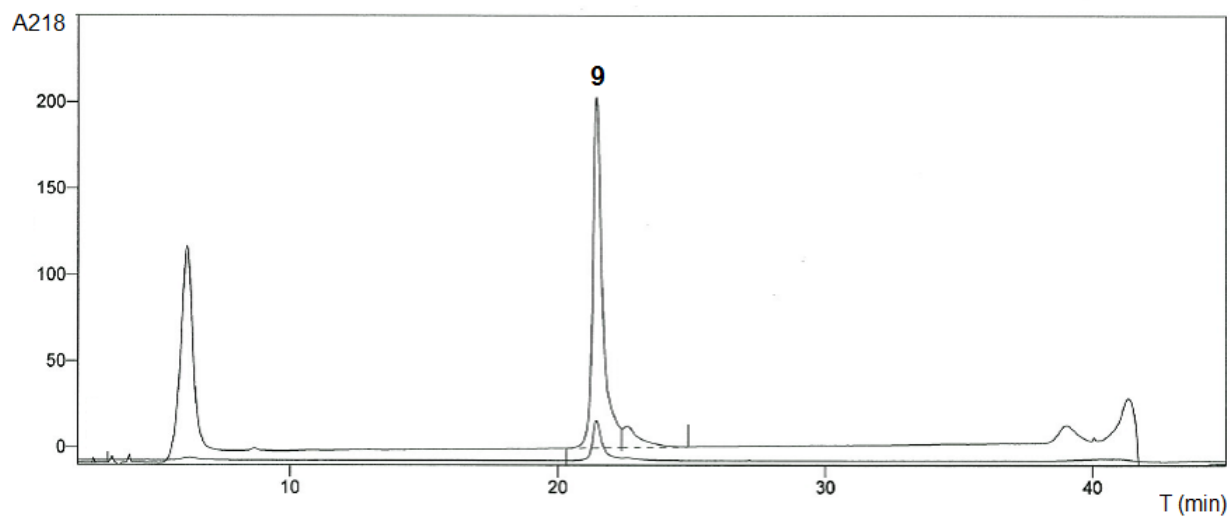

**Figure S15. RP-HPLC analysis of analogue 9.** The peak of the compound is marked by 9.

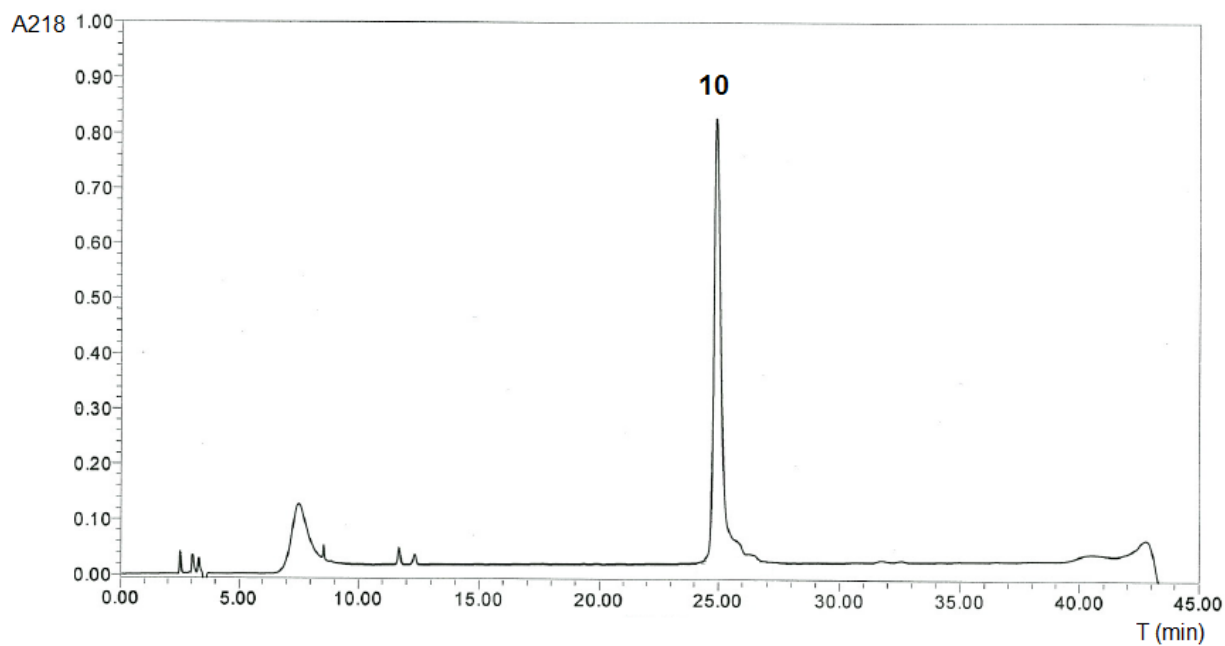

**Figure S16. RP-HPLC analysis of analogue 10.** The peak of the compound is marked by 10.

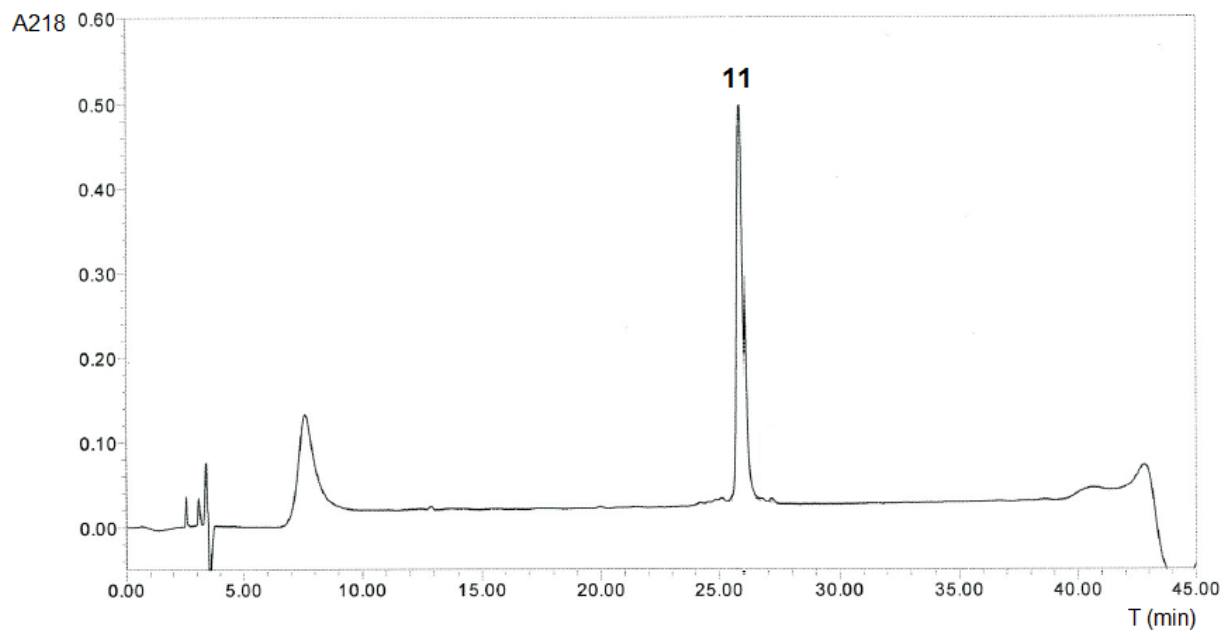

**Figure S17. RP-HPLC analysis of analogue 11.** The peak of the compound is marked by 11.

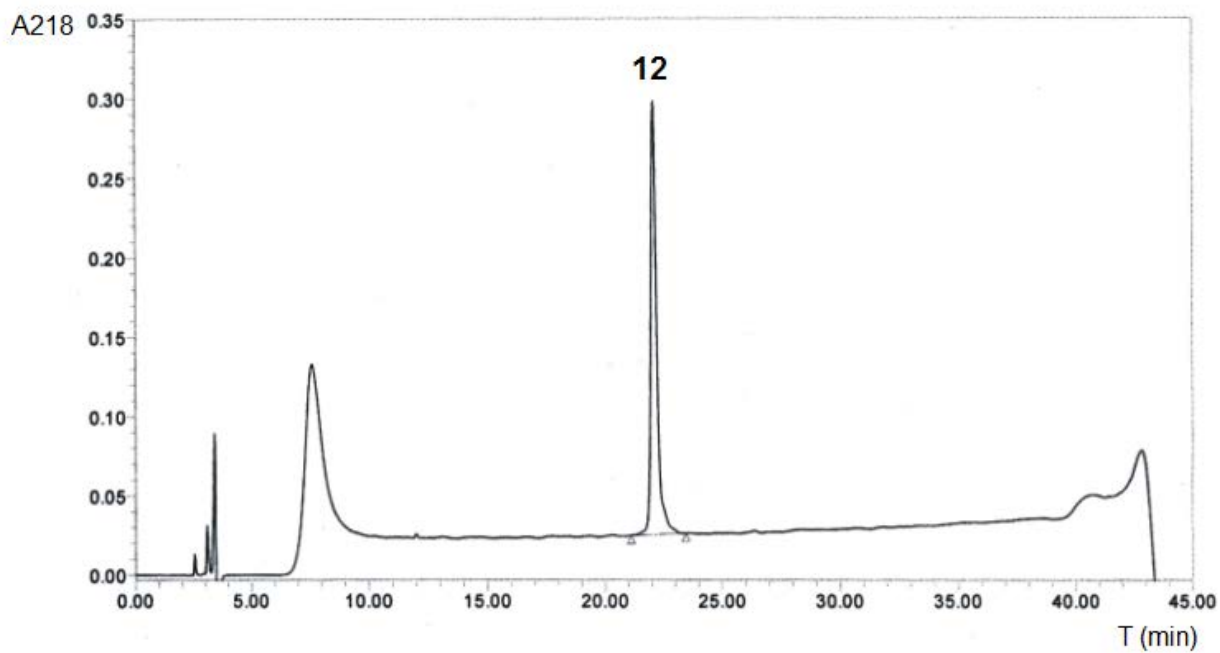

**Figure S18. RP-HPLC analysis of analogue 12.** The peak of the compound is marked by 12.

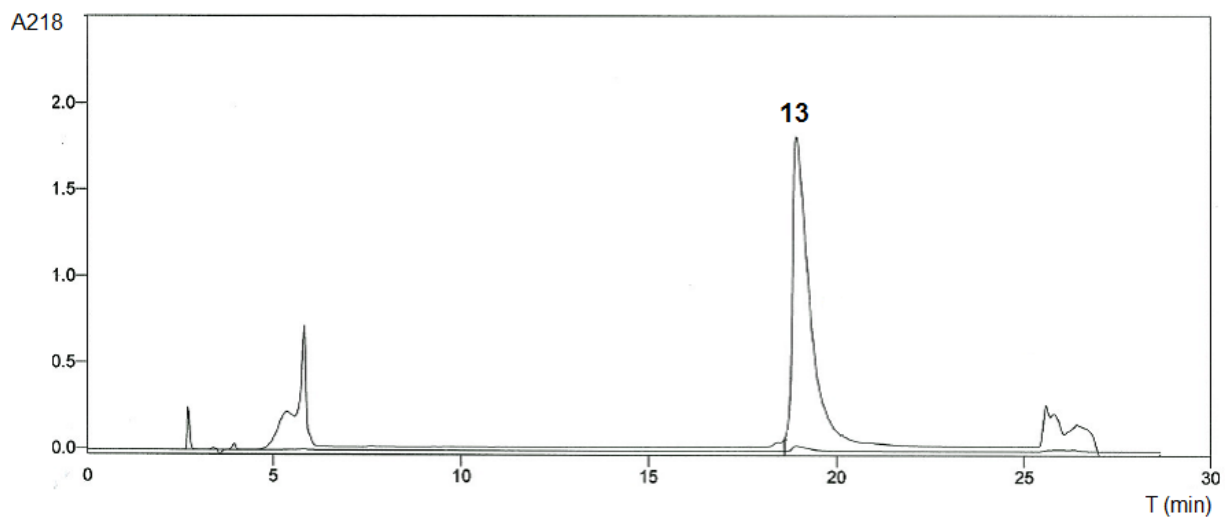

**Figure S19. RP-HPLC analysis of analogue 13.** The peak of the compound is marked by 13.

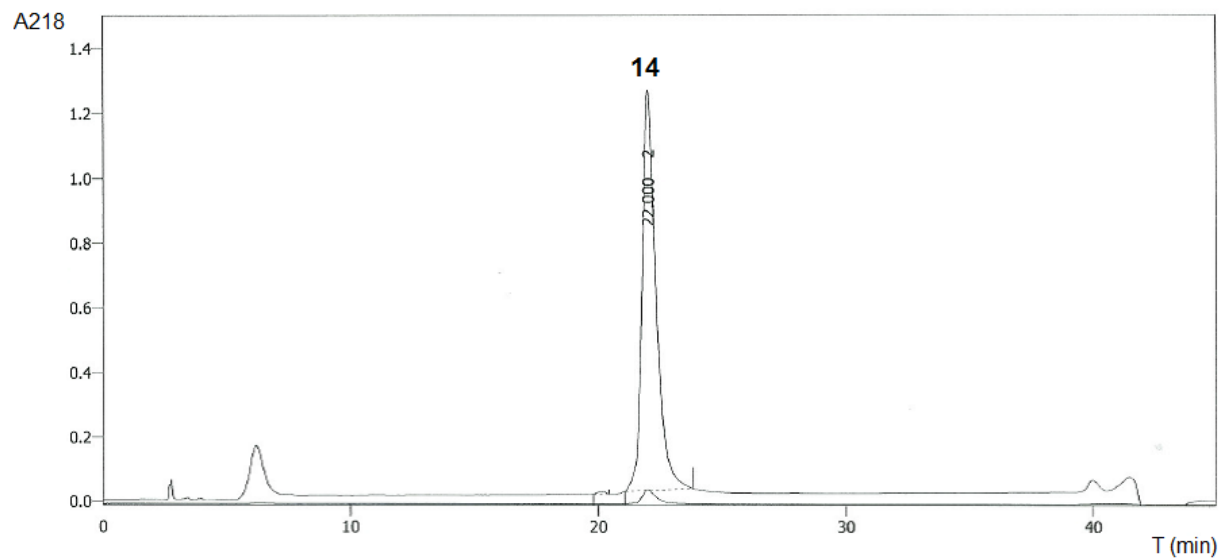

**Figure S20. RP-HPLC analysis of analogue 14.** The peak of the compound is marked by 14.

## NMR characterization of octapeptides **1a**, **6a** and **1b-14b**.

For the description of NMR data, the residues (positions) in octapeptides are numbered 1-8 starting from the N-terminus. The presence of proline in all studied octapeptides led to the observation of two isomers containing either *trans*- and/or *cis*- X-Pro peptide bond. The *trans*- and *cis*- isomer were evidenced by characteristic NOE contacts around corresponding peptide bond: between  $\alpha\text{H}(\text{X})$  and  $\delta\text{H}(\text{Pro})$  in the *trans*- isomer and/or between  $\alpha\text{H}(\text{X})$  and  $\alpha\text{H}(\text{Pro})$  in the *cis*- isomer. In all cases the major isomer is *trans*- and its population appears in the range from >95 % to 61 % (see Supplementary Table 2). The additional tertiary amide bond in compound **14b** (*N*-methyl alanine in position 4) results in the observation of four isomers. Two major isomers contain *trans*- and *cis*- Phe-(*N*Me)Ala peptide bond (in the ratio 72:18, right panel in Supplementary Figure S21) and *trans*- X-Pro bond while two minor isomers have both *cis*- X-Pro peptide bond (left panel in Supplementary Figure S21).

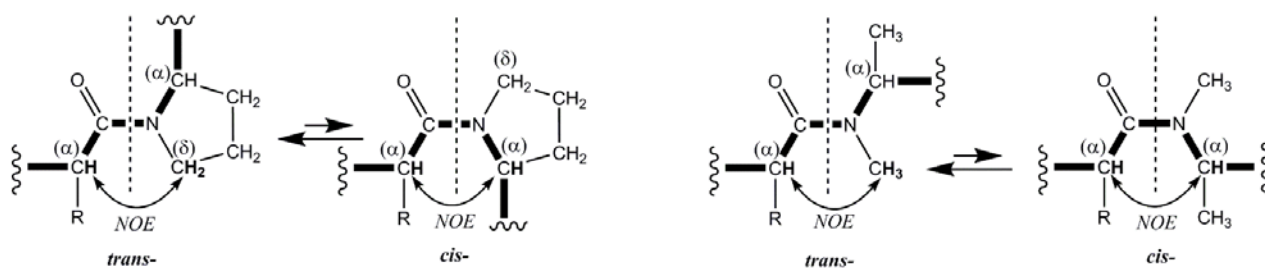

**Supplementary Figure S21. N-Methylated peptide bond isomerization.** *Trans* to *cis* isomerisation of X-Pro peptide bond (left) and *trans* to *cis* isomerization of Phe-(*N*Me)Ala peptide bond (right).

The temperature coefficients of the amide NH protons are rather high for the most of residues in studied peptides **1a**, **6a** and **1b – 14b** (see Supplementary Table S2). The absolute values below 2.2 ppb that could indicate hydrogen bonded NH proton appear only for NH of Thr-5 in peptides **1b**, **3b** and **4b**, the NH of Tyr-4 in peptide **11b** and the NH of Prg-4 in **9b**. The inspection of models shows that such H-bonds could stabilize a cyclic part of given peptides, *e.g.* (Thr-5)N-H...O=C(Phe-3) in **1b**, **3b** and **4b**.

The complete structure assignment of  $^1\text{H}$  and  $^{13}\text{C}$  signals of major *trans*- isomers in studied peptides **1a**, **6a** and **1b – 14b** is summarized in Supplementary Tables S2-S7.

**Supplementary Table S2. The *trans*-/*cis*- isomerism in peptide precursors.** The observed ratio of *trans*-/*cis*- isomers and temperature dependence of amide NH protons of peptides **1a – 14b** in H<sub>2</sub>O:D<sub>2</sub>O (9:1). n.d. = not determined.

| Peptide    |                | X-5/Pro-6 | 2                                                | 3            | 4                                            | 5                                            | 7                                                | 8          |
|------------|----------------|-----------|--------------------------------------------------|--------------|----------------------------------------------|----------------------------------------------|--------------------------------------------------|------------|
| <b>1a</b>  |                |           | <b>D-Prg</b>                                     | <b>Phe</b>   | <b>Tyr</b>                                   | <b>Thr</b>                                   | <b>Nle(<math>\epsilon</math>N<sub>3</sub>)</b>   | <b>Thr</b> |
|            | <i>trans</i> - | 90 %      | -6.0                                             | -8.3         | -6.7                                         | -6.9                                         | -8.1                                             | -7.6       |
|            | <i>cis</i> -   | 10 %      | -6.4                                             | -6.2         | -5.1                                         | -7.0                                         | -8.9                                             | -6.2       |
| <b>1b</b>  |                |           | <b>D-Prg</b>                                     | <b>Phe</b>   | <b>Tyr</b>                                   | <b>Thr</b>                                   | <b>Nle(<math>\epsilon</math>N<sub>3</sub>)</b>   | <b>Thr</b> |
|            | <i>trans</i> - | 81 %      | -6.0                                             | -8.1         | -6.3                                         | -0.8                                         | -8.3                                             | -7.8       |
|            | <i>cis</i> -   | 19 %      | -3.8                                             | -9.7         | -4.5                                         | -7.2                                         | -6.3                                             | -5.6       |
| <b>2b</b>  |                |           | <b>Prg</b>                                       | <b>Phe</b>   | <b>Tyr</b>                                   | <b>Thr</b>                                   | <b>Nle(<math>\epsilon</math>N<sub>3</sub>)</b>   | <b>Thr</b> |
|            | <i>trans</i> - | 62 %      | -6.0                                             | -8.4         | -3.4                                         | -6.2                                         | -4.1                                             | -6.6       |
|            | <i>cis</i> -   | 38 %      | -8.1                                             | -6.2         | -4.1                                         | -5.5                                         | -7.1                                             | -6.6       |
| <b>3b</b>  |                |           | <b>D-Nle(<math>\epsilon</math>N<sub>3</sub>)</b> | <b>Phe</b>   | <b>Tyr</b>                                   | <b>Thr</b>                                   | <b>Prg</b>                                       | <b>Thr</b> |
|            | <i>trans</i> - | 85 %      | -9.2                                             | -8.1         | -5.4                                         | +0.1                                         | -5.2                                             | -9.4       |
|            | <i>cis</i> -   | 15 %      | -4.8                                             | -6.2         | -4.2                                         | -6.8                                         | -7.8                                             | -5.9       |
| <b>4b</b>  |                |           | <b>D-Prg</b>                                     | <b>Phe</b>   | <b>Tyr</b>                                   | <b>Thr</b>                                   | <b>D-Nle(<math>\epsilon</math>N<sub>3</sub>)</b> | <b>Thr</b> |
|            | <i>trans</i> - | 73 %      | -10.7                                            | -7.7         | -10.8                                        | -2.1                                         | -6.3                                             | -6.3       |
|            | <i>cis</i> -   | 27 %      | -8.5                                             | -9.4         | n.d.                                         | -2.0                                         | -4.7                                             | n.d.       |
| <b>5b</b>  |                |           | <b>D-Nle(<math>\epsilon</math>N<sub>3</sub>)</b> | <b>Phe</b>   | <b>Tyr</b>                                   | <b>Thr</b>                                   | <b>D-Prg</b>                                     | <b>Thr</b> |
|            | <i>trans</i> - | 86 %      | -6.4                                             | -8.9         | -9.7                                         | -5.9                                         | -6.9                                             | -3.5       |
|            | <i>cis</i> -   | 14 %      | n.d.                                             | n.d.         | n.d.                                         | n.d.                                         | n.d.                                             | n.d.       |
| <b>6a</b>  |                |           | <b>Phe</b>                                       | <b>Prg</b>   | <b>Tyr</b>                                   | <b>Thr</b>                                   | <b>Nle(<math>\epsilon</math>N<sub>3</sub>)</b>   | <b>Thr</b> |
|            | <i>trans</i> - | 92 %      | -5.9                                             | -7.3         | -8.2                                         | -6.8                                         | -8.8                                             | -8.1       |
|            | <i>cis</i> -   | 8 %       | n.d.                                             | n.d.         | n.d.                                         | n.d.                                         | n.d.                                             | n.d.       |
| <b>6b</b>  |                |           | <b>Phe</b>                                       | <b>Prg</b>   | <b>Tyr</b>                                   | <b>Thr</b>                                   | <b>Nle(<math>\epsilon</math>N<sub>3</sub>)</b>   | <b>Thr</b> |
|            | <i>trans</i> - | 66 %      | -7.1                                             | -5.7         | -5.7                                         | -3.8                                         | -5.9                                             | -9.1       |
|            | <i>cis</i> -   | 34 %      | -6.7                                             | -5.4         | -5.9                                         | -5.5                                         | -5.7                                             | -8.1       |
| <b>7b</b>  |                |           | <b>Phe</b>                                       | <b>D-Prg</b> | <b>Tyr</b>                                   | <b>Thr</b>                                   | <b>Nle(<math>\epsilon</math>N<sub>3</sub>)</b>   | <b>Thr</b> |
|            | <i>trans</i> - | 67 %      | -6.8                                             | -9.1         | -7.0                                         | -3.9                                         | -6.3                                             | -9.8       |
|            | <i>cis</i> -   | 33 %      | -9.2                                             | -11.2        | -5.5                                         | -3.8                                         | -10.2                                            | -9.1       |
| <b>8b</b>  |                |           | <b>Phe</b>                                       | <b>Phe</b>   | <b>Nva(<math>\delta</math>N<sub>3</sub>)</b> | <b>Thr</b>                                   | <b>Prg</b>                                       | <b>Thr</b> |
|            | <i>trans</i> - | >95%      | -6.3                                             | -7.4         | -6.8                                         | -7.8                                         | -9.6                                             | -8.5       |
|            | <i>cis</i> -   | < 5 %     | n.d.                                             | n.d.         | n.d.                                         | n.d.                                         | n.d.                                             | n.d.       |
| <b>9b</b>  |                |           | <b>Phe</b>                                       | <b>Phe</b>   | <b>Prg</b>                                   | <b>Thr</b>                                   | <b>Nva(<math>\delta</math>N<sub>3</sub>)</b>     | <b>Thr</b> |
|            | <i>trans</i> - | 61 %      | -7.2                                             | -8.8         | -2.0                                         | -7.4                                         | -8.6                                             | -8.8       |
|            | <i>cis</i> -   | 39 %      | -7.2                                             | -8.2         | -7.0                                         | -5.0                                         | -11.4                                            | -8.1       |
| <b>10b</b> |                |           | <b>Phe</b>                                       | <b>Phe</b>   | <b>Tyr</b>                                   | <b>Nva(<math>\delta</math>N<sub>3</sub>)</b> | <b>Prg</b>                                       | <b>Thr</b> |
|            | <i>trans</i> - | 83 %      | -7.2                                             | -8.1         | -8.4                                         | -7.2                                         | -9.6                                             | -7.6       |
|            | <i>cis</i> -   | 17 %      | n.d.                                             | n.d.         | n.d.                                         | n.d.                                         | n.d.                                             | n.d.       |
| <b>11b</b> |                |           | <b>Phe</b>                                       | <b>Phe</b>   | <b>Tyr</b>                                   | <b>Nva(<math>\delta</math>N<sub>3</sub>)</b> | <b>Gly</b>                                       | <b>Prg</b> |
|            | <i>trans</i> - | >95%      | -6.2                                             | -7.0         | -1.0                                         | -6.9                                         | -7.9                                             | -7.1       |
|            | <i>cis</i> -   | < 5 %     | n.d.                                             | n.d.         | n.d.                                         | n.d.                                         | n.d.                                             | n.d.       |
| <b>12b</b> |                |           | <b>Gly</b>                                       | <b>Phe</b>   | <b>Tyr</b>                                   | <b>Nva(<math>\delta</math>N<sub>3</sub>)</b> | <b>Prg</b>                                       | <b>Thr</b> |
|            | <i>trans</i> - | >95%      | -5.9                                             | -7.6         | -7.4                                         | -7.0                                         | -8.5                                             | -6.8       |
|            | <i>cis</i> -   | < 5 %     | n.d.                                             | n.d.         | n.d.                                         | n.d.                                         | n.d.                                             | n.d.       |
| <b>13b</b> |                |           | <b>Gly</b>                                       | <b>Phe</b>   | <b>Nva(<math>\delta</math>N<sub>3</sub>)</b> | <b>Thr</b>                                   | <b>Prg</b>                                       | <b>Thr</b> |
|            | <i>trans</i> - | >95%      | -5.8                                             | -7.9         | -6.8                                         | -8.2                                         | -9.4                                             | -8.3       |
|            | <i>cis</i> -   | < 5 %     | n.d.                                             | n.d.         | n.d.                                         | n.d.                                         | n.d.                                             | n.d.       |
| <b>14b</b> |                |           | <b>Gly</b>                                       | <b>Phe</b>   | <b>Ala(NMe)</b>                              | <b>Nva(<math>\delta</math>N<sub>3</sub>)</b> | <b>Prg</b>                                       | <b>Thr</b> |
|            | <i>trans</i> - | 72 %      | -6.5                                             | -9.8         | --                                           | -10.8                                        | -10.5                                            | -8.3       |
|            | <i>cis</i> -   | 28 %      | -7.0                                             | -11.3        | --                                           | -8.0                                         | -10.5                                            | -8.6       |



**Supplementary Table S3. Proton NMR data of peptides 1a – 4b in H<sub>2</sub>O:D<sub>2</sub>O (9:1).**

| Residue (Proton)              | 1a                         | 1b                         | 2b                         | 3b                           | 4b                           |
|-------------------------------|----------------------------|----------------------------|----------------------------|------------------------------|------------------------------|
| <b>1</b>                      | <b>Gly</b>                 | <b>Gly</b>                 | <b>Gly</b>                 | <b>Gly</b>                   | <b>Gly</b>                   |
| C <sup>α</sup> H              | 3.87; 3.835                | 3.73                       | 3.770; 3.692               | 3.71; 3.65                   | 3.815; 3.748                 |
| <b>2</b>                      | <b>D-Prg</b>               | <b>D-Prg</b>               | <b>Prg</b>                 | <b>D-Nle(εN<sub>3</sub>)</b> | <b>D-Prg</b>                 |
| NH (J(Nα))                    | 8.670 (6.9)                | 8.462 (6.6)                | 8.160 (7.5)                | 8.601 (6.4)                  | 8.304 (7.1)                  |
| C <sup>α</sup> H              | 4.48                       | 4.735                      | 4.727                      | 4.42                         | 4.699                        |
| C <sup>β</sup> H              | 2.52; 2.47                 | 3.22; 2.90                 | 3.251; 3.008               | 1.87; 1.54                   | 3.081; 2.908                 |
| C <sup>γ</sup> H              | --                         | --                         | --                         | 1.92; 1.76                   | --                           |
| C <sup>δ</sup> H              | 2.315                      | 7.04                       | 7.254                      | 1.15; 0.70                   | 7.32                         |
| C <sup>ε</sup> H              | --                         | --                         | --                         | 4.425; 4.34                  | --                           |
| <b>3</b>                      | <b>Phe</b>                 | <b>Phe</b>                 | <b>Phe</b>                 | <b>Phe</b>                   | <b>Phe</b>                   |
| NH (J(Nα))                    | 8.451 (7.7)                | 8.636 (6.0)                | 8.745 (8.4)                | 8.601 (5.4)                  | 8.378 (6.7)                  |
| C <sup>α</sup> H              | 4.67                       | 4.395                      | 4.626                      | 4.15                         | 4.506                        |
| C <sup>β</sup> H              | 3.13; 2.92                 | 3.036; 2.83                | 3.132; 2.879               | 2.92; 2.82                   | 3.098; 2.908                 |
| C <sub>6</sub> H <sub>5</sub> | 7.21; 7.35; 7.30           | 7.13; 7.34; 7.28           | 7.19; 7.34; 7.30           | 7.32 – 7.26                  | 7.18; 7.35; 7.31             |
| <b>4</b>                      | <b>Tyr</b>                 | <b>Tyr</b>                 | <b>Tyr</b>                 | <b>Tyr</b>                   | <b>Tyr</b>                   |
| NH (J(Nα))                    | 8.280 (7.3)                | 8.008 (7.7)                | 7.500 (7.5)                | 8.273 (7.8)                  | 8.081 (7.9)                  |
| C <sup>α</sup> H              | 4.61                       | 4.48                       | 4.671                      | 4.43                         | 4.475                        |
| C <sup>β</sup> H              | 2.975; 2.94                | 3.22; 3.05                 | 3.056                      | 3.24; 2.96                   | 3.085                        |
| C <sub>6</sub> H <sub>4</sub> | 7.10; 6.80                 | 7.16; 6.875                | 7.050; 6.767               | 7.18; 6.887                  | 7.114; 6.84                  |
| <b>5</b>                      | <b>Thr</b>                 | <b>Thr</b>                 | <b>Thr</b>                 | <b>Thr</b>                   | <b>Thr</b>                   |
| NH (J(Nα))                    | 8.032 (8.2)                | 7.412 (8.6)                | 7.889 (8.4)                | 7.447 (8.4)                  | 7.525 (8.0)                  |
| C <sup>α</sup> H              | 4.505                      | 4.725                      | 4.441                      | 4.675                        | 4.628                        |
| C <sup>β</sup> H              | 4.03                       | 4.08                       | 4.111                      | 4.043                        | 4.272                        |
| C <sup>γ</sup> H              | 1.17                       | 1.12                       | 1.133                      | 1.211                        | 1.110                        |
| <b>6</b>                      | <b>Pro</b>                 | <b>Pro</b>                 | <b>Pro</b>                 | <b>Pro</b>                   | <b>Pro</b>                   |
| C <sup>α</sup> H              | 4.345                      | 4.31                       | 4.845                      | 4.33                         | 4.374                        |
| C <sup>β</sup> H              | 2.31; 1.94                 | 2.29; 1.84                 | 2.395; 2.184               | 2.307; 1.88                  | 2.264; 1.933                 |
| C <sup>γ</sup> H              | 2.02; 1.97                 | 2.04; 1.94                 | 1.976; 1.847               | 2.00; 1.95                   | 1.976; 1.927                 |
| C <sup>δ</sup> H              | 3.67; 3.61                 | 3.78; 3.62                 | 3.671; 3.528               | 3.735; 3.669                 | 3.741; 3.572                 |
| <b>7</b>                      | <b>Nle(εN<sub>3</sub>)</b> | <b>Nle(εN<sub>3</sub>)</b> | <b>Nle(εN<sub>3</sub>)</b> | <b>Prg</b>                   | <b>D-Nle(εN<sub>3</sub>)</b> |
| NH (J(Nα))                    | 8.378 (6.8)                | 8.543 (6.9)                | 8.642 (7.2)                | 8.631 (6.7)                  | 7.690 (7.1)                  |
| C <sup>α</sup> H              | 4.34                       | 4.27                       | 4.425                      | 4.76                         | 4.401                        |
| C <sup>β</sup> H              | 1.87; 1.77                 | 1.92; 1.72                 | 1.914; 1.784               | 3.33; 3.11                   | 1.858                        |
| C <sup>γ</sup> H              | 1.50; 1.45                 | 1.42; 1.18                 | 1.46                       | --                           | 1.808; 1.715                 |
| C <sup>δ</sup> H              | 1.62                       | 1.94; 1.86                 | 1.87; 1.82                 | 7.914                        | 1.245; 1.161                 |
| C <sup>ε</sup> H              | 3.33                       | 4.385; 4.29                | 4.36; 4.27                 | --                           | 4.346                        |
| <b>8</b>                      | <b>Thr</b>                 | <b>Thr</b>                 | <b>Thr</b>                 | <b>Thr</b>                   | <b>Thr</b>                   |
| NH (J(Nα))                    | 8.046 (8.5)                | 8.065 (8.8)                | 7.951 (8.5)                | 8.407 (8.7)                  | 7.959 (8.8)                  |
| C <sup>α</sup> H              | 4.365                      | 4.44                       | 4.325                      | 4.51                         | 4.459                        |
| C <sup>β</sup> H              | 4.34                       | 4.345                      | 4.321                      | 4.44                         | 4.40                         |
| C <sup>γ</sup> H              | 1.19                       | 1.16                       | 1.157                      | 1.205                        | 1.161                        |

**Supplementary Table S4. Proton NMR data of peptides 5b – 8b in H<sub>2</sub>O:D<sub>2</sub>O (9:1).**

| Residue (Proton)              | 5b                           | 6a                         | 6b                         | 7b                         | 8b                         |
|-------------------------------|------------------------------|----------------------------|----------------------------|----------------------------|----------------------------|
| <b>1</b>                      | <b>Gly</b>                   | <b>Gly</b>                 | <b>Gly</b>                 | <b>Gly</b>                 | <b>Gly</b>                 |
| C <sup>α</sup> H              | 3.814; 3.748                 | 3.81; 3.735                | 3.845; 3.794               | 3.830; 3.785               | 3.792; 3.743               |
| <b>2</b>                      | <b>D-Nle(εN<sub>3</sub>)</b> | <b>Phe</b>                 | <b>Phe</b>                 | <b>Phe</b>                 | <b>Phe</b>                 |
| NH (J(Nα))                    | 8.402 (6.7)                  | 8.570 (7.2)                | 8.660 (6.4)                | 8.661 (6.2)                | 8.511 (7.1)                |
| C <sup>α</sup> H              | 4.268                        | 4.665                      | 4.506                      | 4.599                      | 4.645                      |
| C <sup>β</sup> H              | 1.57; 1.509                  | 3.02; 2.95                 | 2.948; 2.82                | 3.074; 3.004               | 3.018; 2.975               |
| C <sub>6</sub> H <sub>5</sub> | --                           | 7.21; 7.33; 7.30           | 7.30 – 7.25; 7.01          | 7.28; 7.40; 7.34           | 7.20; 7.34; 7.31           |
| C <sup>γ</sup> H              | 1.841                        | --                         | --                         | --                         | --                         |
| C <sup>δ</sup> H              | 1.225; 1.066                 | --                         | --                         | --                         | --                         |
| C <sup>ε</sup> H              | 4.417; 4.358                 | --                         | --                         | --                         | --                         |
| <b>3</b>                      | <b>Phe</b>                   | <b>Prg</b>                 | <b>Prg</b>                 | <b>D-Prg</b>               | <b>Phe</b>                 |
| NH (J(Nα))                    | 8.302 (7.5)                  | 8.381 (7.6)                | 8.199 (7.8)                | 8.223 (8.2)                | 8.221 (7.6)                |
| C <sup>α</sup> H              | 4.468                        | 4.495                      | 4.578                      | 4.646                      | 4.558                      |
| C <sup>β</sup> H              | 3.055; 2.942                 | 2.64; 2.61                 | 3.077; 2.97                | 3.288; 2.741               | 2.987                      |
| C <sub>6</sub> H <sub>5</sub> | 7.11; 7.33; 7.30             | --                         | --                         | --                         | 7.20; 7.34; 7.31           |
| C <sup>δ</sup> H              | --                           | 2.42                       | 7.538                      | 7.385                      | --                         |
| <b>4</b>                      | <b>Tyr</b>                   | <b>Tyr</b>                 | <b>Tyr</b>                 | <b>Tyr</b>                 | <b>Nva(δN<sub>3</sub>)</b> |
| NH (J(Nα))                    | 8.138 (6.8)                  | 8.262 (7.2)                | 8.003 (6.2)                | 7.233 (6.7)                | 7.984 (6.7)                |
| C <sup>α</sup> H              | 4.454                        | 4.595                      | 4.344                      | 4.538                      | 4.396                      |
| C <sup>β</sup> H              | 3.164; 3.048                 | 2.98                       | 2.941; 2.809               | 2.963; 2.924               | 1.874; 1.754               |
| C <sub>6</sub> H <sub>4</sub> | 7.163; 6.862                 | 7.13; 6.81                 | 7.16; 6.82                 | 7.025; 6.801               | 2.117; 1.874               |
| C <sup>γ</sup> H              | --                           | --                         | --                         | --                         | 4.48; 4.33                 |
| C <sup>δ</sup> H              | --                           | --                         | --                         | --                         | --                         |
| <b>5</b>                      | <b>Thr</b>                   | <b>Thr</b>                 | <b>Thr</b>                 | <b>Thr</b>                 | <b>Thr</b>                 |
| NH (J(Nα))                    | 7.669 (8.0)                  | 8.034 (8.2)                | 7.760 (9.4)                | 7.836 (9.1)                | 8.081 (6.6)                |
| C <sup>α</sup> H              | 4.635                        | 4.53                       | 4.409                      | 4.423                      | 4.317                      |
| C <sup>β</sup> H              | 4.242                        | 4.04                       | 4.111                      | 4.111                      | 4.344                      |
| C <sup>γ</sup> H              | 1.132                        | 1.18                       | 1.181                      | 1.207                      | 1.302                      |
| <b>6</b>                      | <b>Pro</b>                   | <b>Pro</b>                 | <b>Pro</b>                 | <b>Pro</b>                 | <b>Pro</b>                 |
| C <sup>α</sup> H              | 4.418                        | 4.35                       | 4.647                      | 4.680                      | 4.096                      |
| C <sup>β</sup> H              | 2.234; 1.975                 | 2.30; 1.97                 | 2.464; 2.122               | 2.447; 2.145               | 2.276; 1.806               |
| C <sup>γ</sup> H              | 2.004; 1.981                 | 2.01; 1.95                 | 2.426; 1.932               | 1.947                      | 2.143; 1.983               |
| C <sup>δ</sup> H              | 3.732; 3.647                 | 3.66; 3.62                 | 3.61; 3.495                | 3.626; 3.509               | 3.803; 3.576               |
| <b>7</b>                      | <b>D-Prg</b>                 | <b>Nle(εN<sub>3</sub>)</b> | <b>Nle(εN<sub>3</sub>)</b> | <b>Nle(εN<sub>3</sub>)</b> | <b>Prg</b>                 |
| NH (J(Nα))                    | 7.895 (7.8)                  | 8.365 (7.0)                | 8.822 (6.0)                | 8.798 (6.0)                | 8.717 (5.9)                |
| C <sup>α</sup> H              | 4.342                        | 4.345                      | 4.331                      | 4.289                      | 4.627                      |
| C <sup>β</sup> H              | 3.317; 3.283                 | 1.87; 1.77                 | 1.877; 1.813               | 1.988; 1.852               | 3.380; 3.106               |
| C <sup>γ</sup> H              | --                           | 1.48                       | 1.625; 1.534               | 1.602; 1.492               | --                         |
| C <sup>δ</sup> H              | 7.883                        | 1.63                       | 2.122; 1.933               | 2.076; 1.898               | ???                        |
| C <sup>ε</sup> H              | --                           | 3.335                      | 4.46; 4.19                 | 4.462; 4.187               | --                         |
| <b>8</b>                      | <b>Thr</b>                   | <b>Thr</b>                 | <b>Thr</b>                 | <b>Thr</b>                 | <b>Thr</b>                 |
| NH (J(Nα))                    | 7.890 (7.6)                  | 8.067 (8.6)                | 8.279 (8.7)                | 8.030 (8.8)                | 8.246 (8.5)                |
| C <sup>α</sup> H              | 4.769                        | 4.39                       | 4.466                      | 4.491                      | 4.522                      |
| C <sup>β</sup> H              | 4.322                        | 4.35                       | 4.398                      | 4.410                      | 4.436                      |
| C <sup>γ</sup> H              | 1.176                        | 1.18                       | 1.190                      | 1.201                      | 1.196                      |

**Supplementary Table S5. Proton NMR data of peptides 9b – 14b in H<sub>2</sub>O:D<sub>2</sub>O (9:1).**

| Residue (Proton)              | 9b                         | 10b                        | 11b                        | 12b                        | 13b                        | 14b                        |
|-------------------------------|----------------------------|----------------------------|----------------------------|----------------------------|----------------------------|----------------------------|
| <b>1</b>                      | <b>Gly</b>                 | <b>Gly</b>                 | <b>Gly</b>                 | <b>Gly</b>                 | <b>Gly</b>                 | <b>Gly</b>                 |
| C <sup>α</sup> H              | 3.731; 3.654               | 3.78; 3.72                 | 3.77; 3.72                 | 3.87                       | 3.868                      | 3.87                       |
| <b>2</b>                      | <b>Phe</b>                 | <b>Phe</b>                 | <b>Phe</b>                 | <b>Gly</b>                 | <b>Gly</b>                 | <b>Gly</b>                 |
| NH (J(N <sup>α</sup> ))       | 8.436 (7.7)                | 8.487 (7.2)                | 8.471 (7.1)                | 8.472 (5.8)                | 8.487 (5.9)                | 8.475 (6.0)                |
| C <sup>α</sup> H              | 4.684                      | 4.62                       | 4.61                       | 3.96                       | 3.974                      | 3.97                       |
| C <sup>β</sup> H              | 3.034; 2.851               | 2.97; 2.92                 | 2.97; 2.92                 | --                         | --                         | --                         |
| C <sub>δ</sub> H <sub>5</sub> | 7.21; 7.34; 7.30           | 7.17; 7.33; 7.31           | 7.16; 7.31; 7.31           | --                         | --                         | --                         |
| <b>3</b>                      | <b>Phe</b>                 | <b>Phe</b>                 | <b>Phe</b>                 | <b>Phe</b>                 | <b>Phe</b>                 | <b>Phe</b>                 |
| NH (J(N <sup>α</sup> ))       | 8.544 (7.8)                | 8.210 (7.6)                | 8.192 (7.6)                | 8.207 (7.1)                | 8.251 (7.0)                | 8.350 (7.0)                |
| C <sup>α</sup> H              | 4.686                      | 4.57                       | 4.54                       | 4.61                       | 4.618                      | 5.045                      |
| C <sup>β</sup> H              | 3.180; 3.002               | 2.97 (2H)                  | 2.96 (2H)                  | 3.03; 3.00                 | 3.066; 3.030               | 3.07; 3.01                 |
| C <sub>δ</sub> H <sub>5</sub> | 7.21; 7.34; 7.30           | 7.19; 7.33; 7.31           | 7.18; 7.31; 7.31           | 7.21; 7.35; 7.31           | 7.23; 7.35; 7.30           | 7.40 – 7.24                |
| <b>4</b>                      | <b>Prg</b>                 | <b>Tyr</b>                 | <b>Tyr</b>                 | <b>Tyr</b>                 | <b>Nva(δN<sub>3</sub>)</b> | <b>Ala(NMe)</b>            |
| NH (J(N <sup>α</sup> ))       | 7.660 (7.2)                | 8.037 (7.2)                | 8.001 (7.4)                | 8.137 (7.1)                | 8.084 (6.8)                | --                         |
| C <sup>α</sup> H              | 4.720                      | 4.37                       | 4.31                       | 4.42                       | 4.455                      | 4.69                       |
| C <sup>β</sup> H              | 3.173                      | 2.87; 2.76                 | 2.87; 2.78                 | 2.91; 2.77                 | 1.88                       | 1.24                       |
| C <sub>δ</sub> H <sub>4</sub> | --                         | 7.02; 6.76                 | 7.04; 6.78                 | 7.01; 6.75                 | --                         | --                         |
| C <sup>γ</sup> H              | --                         | --                         | --                         | --                         | 2.12; 1.78                 | --                         |
| C <sup>δ</sup> H              | 7.783                      | --                         | --                         | --                         | 4.29                       | --                         |
| N-Me                          | --                         | --                         | --                         | --                         | --                         | 2.89                       |
| <b>5</b>                      | <b>Thr</b>                 | <b>Nva(δN<sub>3</sub>)</b> | <b>Nva(δN<sub>3</sub>)</b> | <b>Nva(δN<sub>3</sub>)</b> | <b>Thr</b>                 | <b>Nva(δN<sub>3</sub>)</b> |
| NH (J(N <sup>α</sup> ))       | 8.220 (8.2)                | 7.840 (7.2)                | 7.909 (7.5)                | 7.840 (7.3)                | 8.109 (6.5)                | 7.765 (5.4)                |
| C <sup>α</sup> H              | 4.359                      | 4.26                       | 4.385                      | 4.285                      | 4.328                      | 4.32                       |
| C <sup>β</sup> H              | 3.984                      | 1.68; 1.47                 | 1.56; 1.06                 | 1.71; 1.49                 | 4.343                      | 1.66; 1.43                 |
| C <sup>γ</sup> H              | 1.147                      | 2.19; 1.32                 | 2.06; 1.81                 | 2.23; 1.32                 | 1.304                      | 2.27; 1.64                 |
| C <sup>δ</sup> H              | --                         | 4.40; 4.29                 | 4.45; 4.33                 | 4.44; 4.32                 | --                         | 4.46; 4.33                 |
| <b>6</b>                      | <b>Pro</b>                 | <b>Pro</b>                 | <b>Pro</b>                 | <b>Pro</b>                 | <b>Pro</b>                 | <b>Pro</b>                 |
| C <sup>α</sup> H              | 4.868                      | 4.29                       | 4.285                      | 4.25                       | 4.102                      | 4.46                       |
| C <sup>β</sup> H              | 2.363; 2.098               | 2.02 (2H)                  | 2.29; 1.92                 | 2.06; 2.01                 | 2.278; 1.811               | 2.06; 2.01                 |
| C <sup>γ</sup> H              | 1.972; 1.862               | 2.11; 1.95                 | 2.05; 1.97                 | 2.12; 1.95                 | 2.141; 1.99                | 2.17; 2.03                 |
| C <sup>δ</sup> H              | 3.665; 3.519               | 3.50; 3.43                 | 3.64; 3.55                 | 3.51; 3.40                 | 3.813; 3.581               | 3.79; 3.61                 |
| <b>7</b>                      | <b>Nva(δN<sub>3</sub>)</b> | <b>Prg</b>                 | <b>Gly</b>                 | <b>Prg</b>                 | <b>Prg</b>                 | <b>Prg</b>                 |
| NH (J(N <sup>α</sup> ))       | 8.626 (8.2)                | 8.216 (8.9)                | 8.514 (6.3; 5.9)           | 8.217 (8.7)                | 8.706 (6.9)                | 8.254 (8.9)                |
| C <sup>α</sup> H              | 4.578                      | 5.05                       | 4.18; 3.73                 | 5.105                      | 4.613                      | 5.11                       |
| C <sup>β</sup> H              | 1.77; 1.096                | 3.37; 3.12                 | --                         | 3.385; 3.15                | 3.363; 3.119               | 3.39; 3.15                 |
| C <sup>γ</sup> H              | 1.772; 1.647               | --                         | --                         | --                         | --                         | --                         |
| C <sup>δ</sup> H              | 4.514                      | 7.64                       | --                         | 7.74                       | 8.083                      | 7.70                       |
| <b>8</b>                      | <b>Thr</b>                 | <b>Thr</b>                 | <b>Prg</b>                 | <b>Thr</b>                 | <b>Thr</b>                 | <b>Thr</b>                 |
| NH (J(N <sup>α</sup> ))       | 8.428 (8.5)                | 8.277 (8.5)                | 7.835 (7.0)                | 8.217 (8.7)                | 8.227 (8.7)                | 8.320 (8.4)                |
| C <sup>α</sup> H              | 4.682                      | 4.48                       | 4.59                       | 4.55                       | 4.494                      | 4.51                       |
| C <sup>β</sup> H              | 4.408                      | 4.42                       | 3.42; 3.37                 | 4.45                       | 4.42                       | 4.43                       |
| C <sup>γ</sup> H              | 1.200                      | 1.22                       | --                         | 1.23                       | 1.190                      | 1.22                       |
| C <sup>δ</sup> H              | --                         | --                         | 7.76                       | --                         | --                         | --                         |

**Supplementary Table 6. Carbon-13 NMR data of peptides 1a – 6b in H<sub>2</sub>O:D<sub>2</sub>O (9:1).**

| Residue (Carbon) | 1a                         | 1b                         | 2b                         | 3b                           | 4b                           | 5b                           | 6a                         | 6b                         |
|------------------|----------------------------|----------------------------|----------------------------|------------------------------|------------------------------|------------------------------|----------------------------|----------------------------|
| <b>1</b>         | <b>Gly</b>                 | <b>Gly</b>                 | <b>Gly</b>                 | <b>Gly</b>                   | <b>Gly</b>                   | <b>Gly</b>                   | <b>Gly</b>                 | <b>Gly</b>                 |
| CO               | 169.86                     | 169.37                     | 169.13                     | 169.28                       | 169.49                       | 169.82                       | 169.59                     | 169.57                     |
| C <sup>α</sup>   | 43.26                      | 43.30                      | 43.32                      | 43.26                        | 43.39                        | 43.26                        | 43.19                      | 43.21                      |
| <b>2</b>         | <b>D-Prg</b>               | <b>D-Prg</b>               | <b>Prg</b>                 | <b>D-Nle(εN<sub>3</sub>)</b> | <b>D-Prg</b>                 | <b>D-Nle(εN<sub>3</sub>)</b> | <b>Phe</b>                 | <b>Phe</b>                 |
| CO               | 174.26                     | 174.57                     | 172.14                     | 175.88                       | 174.75                       | 176.10                       | 175.39                     | 174.55                     |
| C <sup>α</sup>   | 55.06                      | 55.74                      | 55.28                      | 55.78                        | 56.30                        | 56.27                        | 57.75                      | 58.73                      |
| C <sup>β</sup>   | 24.00                      | 30.21                      | 30.77                      | 31.82                        | 30.24                        | 32.92                        | 40.11                      | 40.15                      |
| C <sup>γ</sup>   | 81.41                      | 144.15                     | 143.83                     | 30.35                        | 144.61                       | 31.25                        | 138.47                     | 138.49                     |
| C <sup>δ</sup>   | 75.27                      | 127.30                     | 126.64                     | 21.89                        | 127.34                       | 24.01                        | 131.89                     | 131.86                     |
| C <sup>ε</sup>   | --                         | --                         | --                         | 51.49                        | --                           | 52.50                        | 131.50                     | 131.42                     |
| C <sup>ζ</sup>   | --                         | --                         | --                         | --                           | --                           | --                           | 129.96                     | 129.81                     |
| <b>3</b>         | <b>Phe</b>                 | <b>Phe</b>                 | <b>Phe</b>                 | <b>Phe</b>                   | <b>Phe</b>                   | <b>Phe</b>                   | <b>Prg</b>                 | <b>Prg</b>                 |
| CO               | 175.21                     | 175.92                     | 174.33                     | 176.20                       | 175.66                       | 175.78                       | 173.63                     | 173.07                     |
| C <sup>α</sup>   | 57.54                      | 59.44                      | 57.99                      | 59.72                        | 58.63                        | 58.50                        | 57.57                      | 58.02                      |
| C <sup>β</sup>   | 39.82                      | 38.68                      | 40.02                      | 38.75                        | 39.16                        | 39.21                        | 23.99                      | 29.88                      |
| C <sup>γ</sup>   | 138.88                     | 139.47                     | 139.18                     | 138.73                       | 139.25                       | 139.02                       | 81.90                      | 144.30                     |
| C <sup>δ</sup>   | 131.86                     | 131.77                     | 131.86                     | 131.62                       | 131.85                       | 131.77                       | 75.17                      | n.d.                       |
| C <sup>ε</sup>   | 131.52                     | 131.62                     | 131.48                     | 131.43                       | 131.65                       | 131.50                       | --                         | --                         |
| C <sup>ζ</sup>   | 129.90                     | 130.02                     | 129.87                     | 129.88                       | 130.07                       | 129.87                       | --                         | --                         |
| <b>4</b>         | <b>Tyr</b>                 | <b>Tyr</b>                 | <b>Tyr</b>                 | <b>Tyr</b>                   | <b>Tyr</b>                   | <b>Tyr</b>                   | <b>Tyr</b>                 | <b>Tyr</b>                 |
| CO               | 175.02                     | 175.45                     | 174.18                     | 176.04                       | 175.52                       | 175.92                       | 175.12                     | 174.34                     |
| C <sup>α</sup>   | 57.92                      | 58.68                      | 57.38                      | 59.09                        | 49.16                        | 59.29                        | 57.92                      | 58.10                      |
| C <sup>β</sup>   | 39.12                      | 38.13                      | 39.10                      | 38.29                        | 37.71                        | 38.10                        | 39.08                      | 39.01                      |
| C <sup>γ</sup>   | 130.52                     | 131.16                     | 131.25                     | 131.58                       | 130.78                       | 130.88                       | 130.39                     | 130.59                     |
| C <sup>δ</sup>   | 133.28                     | 133.23                     | 133.54                     | 133.28                       | 133.26                       | 133.25                       | 133.30                     | 133.48                     |
| C <sup>ε</sup>   | 118.13                     | 118.47                     | 118.32                     | 118.43                       | 118.43                       | 118.46                       | 118.19                     | 118.38                     |
| C <sup>ζ</sup>   | 157.24                     | 157.47                     | 157.55                     | 157.39                       | 157.44                       | 157.41                       | 157.33                     | 157.32                     |
| <b>5</b>         | <b>Thr</b>                 | <b>Thr</b>                 | <b>Thr</b>                 | <b>Thr</b>                   | <b>Thr</b>                   | <b>Thr</b>                   | <b>Thr</b>                 | <b>Thr</b>                 |
| CO               | 171.92                     | 171.84                     | 172.14                     | 171.44                       | 172.88                       | 173.00                       | 172.01                     | 172.47                     |
| C <sup>α</sup>   | 59.15                      | 58.97                      | 58.70                      | 59.28                        | n.d.                         | 55.72                        | 59.20                      | 60.79                      |
| C <sup>β</sup>   | 70.18                      | 70.35                      | 70.68                      | 70.66                        | 69.48                        | 69.69                        | 70.13                      | 70.13                      |
| C <sup>γ</sup>   | 21.71                      | 21.38                      | 21.13                      | 21.43                        | 21.67                        | 21.49                        | 21.22                      | 21.59                      |
| <b>6</b>         | <b>Pro</b>                 | <b>Pro</b>                 | <b>Pro</b>                 | <b>Pro</b>                   | <b>Pro</b>                   | <b>Pro</b>                   | <b>Pro</b>                 | <b>Pro</b>                 |
| CO               | 176.83                     | 177.20                     | 176.14                     | 176.36                       | 176.85                       | 177.05                       | 176.61                     | 176.50                     |
| C <sup>α</sup>   | 62.98                      | 63.40                      | 62.64                      | 62.96                        | 64.03                        | 63.84                        | 62.99                      | 62.29                      |
| C <sup>β</sup>   | 32.21                      | 32.09                      | 32.04                      | 32.27                        | 31.63                        | 31.86                        | 32.19                      | 34.54                      |
| C <sup>γ</sup>   | 27.28                      | 27.66                      | 27.48                      | 27.39                        | 27.50                        | 27.27                        | 27.27                      | 25.37                      |
| C <sup>δ</sup>   | 51.03                      | 51.03                      | 50.23                      | 50.94                        | 50.98                        | 50.99                        | 51.02                      | 50.53                      |
| <b>7</b>         | <b>Nle(εN<sub>3</sub>)</b> | <b>Nle(εN<sub>3</sub>)</b> | <b>Nle(εN<sub>3</sub>)</b> | <b>Prg</b>                   | <b>D-Nle(εN<sub>3</sub>)</b> | <b>D-Prg</b>                 | <b>Nle(εN<sub>3</sub>)</b> | <b>Nle(εN<sub>3</sub>)</b> |
| CO               | 176.64                     | 176.52                     | 175.57                     | 175.82                       | 176.50                       | 174.69                       | 176.89                     | 176.25                     |
| C <sup>α</sup>   | 56.69                      | 56.78                      | 56.27                      | 56.53                        | 56.21                        | 62.31                        | 56.67                      | 56.44                      |
| C <sup>β</sup>   | 33.21                      | 32.73                      | 32.88                      | 29.54                        | 31.19                        | 29.98                        | 33.22                      | 32.75                      |
| C <sup>γ</sup>   | 25.09                      | 24.70                      | 24.88                      | 145.70                       | 32.88                        | 145.32                       | 25.08                      | 25.08                      |
| C <sup>δ</sup>   | 30.28                      | 30.85                      | 31.30                      | 126.97                       | 24.04                        | 126.96                       | 30.28                      | 30.45                      |
| C <sup>ε</sup>   | 53.60                      | 52.66                      | 52.85                      | --                           | 52.82                        | --                           | 53.62                      | 53.41                      |
| <b>8</b>         | <b>Thr</b>                 | <b>Thr</b>                 | <b>Thr</b>                 | <b>Thr</b>                   | <b>Thr</b>                   | <b>Thr</b>                   | <b>Thr</b>                 | <b>Thr</b>                 |
| CO               | 177.26                     | 177.34                     | 177.82                     | 177.36                       | 176.55                       | 177.65                       | 176.98                     | 177.74                     |
| C <sup>α</sup>   | 61.57                      | 60.78                      | 61.88                      | 60.90                        | 60.81                        | 59.46                        | 61.37                      | 60.87                      |
| C <sup>β</sup>   | 70.33                      | 70.10                      | 70.44                      | 70.04                        | 70.02                        | 70.52                        | 70.25                      | 70.20                      |
| C <sup>γ</sup>   | 21.17                      | 21.58                      | 21.80                      | 21.63                        | 21.72                        | 21.92                        | 21.87                      | 21.88                      |

**Supplementary Table S7. Carbon-13 NMR data of peptides 7b – 14b in H<sub>2</sub>O:D<sub>2</sub>O (9:1).**

| Residue (Carbon) | 7b                         | 8b                         | 9b                         | 10b                        | 11b                        | 12b                        | 13b                        | 14b                        |
|------------------|----------------------------|----------------------------|----------------------------|----------------------------|----------------------------|----------------------------|----------------------------|----------------------------|
| <b>1</b>         | <b>Gly</b>                 | <b>Gly</b>                 | <b>Gly</b>                 | <b>Gly</b>                 | <b>Gly</b>                 | <b>Gly</b>                 | <b>Gly</b>                 | <b>Gly</b>                 |
| CO               | 169.89                     | 169.54                     | 169.41                     | 169.50                     | 169.37                     | 170.35                     | n.d.                       | 170.48                     |
| C <sup>α</sup>   | 43.20                      | 43.22                      | 43.14                      | 43.20                      | 42.93                      | 43.09                      | 43.35                      | 43.37                      |
| <b>2</b>         | <b>Phe</b>                 | <b>Phe</b>                 | <b>Phe</b>                 | <b>Phe</b>                 | <b>Phe</b>                 | <b>Gly</b>                 | <b>Gly</b>                 | <b>Gly</b>                 |
| CO               | 175.70                     | 175.89                     | 175.42                     | 174.98                     | 174.20                     | 173.33                     | 173.50                     | 173.12                     |
| C <sup>α</sup>   | 58.61                      | 57.91                      | 57.54                      | 57.82                      | 57.78                      | 44.78                      | 44.94                      | 44.86                      |
| C <sup>β</sup>   | 39.72                      | 40.20                      | 40.18                      | 40.10                      | 40.14                      | --                         | --                         | --                         |
| C <sup>γ</sup>   | 138.78                     | 138.77                     | 139.19                     | 138.75                     | 138.74                     | --                         | --                         | --                         |
| C <sup>δ</sup>   | 131.87                     | 131.97                     | 131.95                     | 131.87                     | 131.86                     | --                         | --                         | --                         |
| C <sup>ε</sup>   | 131.63                     | 131.48                     | 131.45                     | 131.38                     | 131.47                     | --                         | --                         | --                         |
| C <sup>ζ</sup>   | 130.12                     | 129.96                     | 129.95                     | 129.93                     | 129.94                     | --                         | --                         | --                         |
| <b>3</b>         | <b>D-Prg</b>               | <b>Phe</b>                 | <b>Phe</b>                 | <b>Phe</b>                 | <b>Phe</b>                 | <b>Phe</b>                 | <b>Phe</b>                 | <b>Phe</b>                 |
| CO               | 174.14                     | 174.19                     | 174.80                     | 174.27                     | 174.23                     | 175.06                     | 175.04                     | 175.29                     |
| C <sup>α</sup>   | 55.39                      | 57.52                      | 57.54                      | 57.47                      | 57.34                      | 57.59                      | 57.77                      | 56.85                      |
| C <sup>β</sup>   | 29.20                      | 40.07                      | 39.83                      | 40.12                      | 40.08                      | 39.93                      | 40.01                      | 39.59                      |
| C <sup>γ</sup>   | 144.16                     | 138.75                     | 138.85                     | 138.77                     | 138.72                     | 138.74                     | 138.76                     | 138.59                     |
| C <sup>δ</sup>   | 127.27                     | 131.86                     | 131.92                     | 131.97                     | 131.96                     | 131.91                     | 131.92                     | 132.12                     |
| C <sup>ε</sup>   | --                         | 131.42                     | 131.44                     | 131.47                     | 131.39                     | 131.43                     | 131.47                     | 131.45                     |
| C <sup>ζ</sup>   | --                         | 129.84                     | 129.83                     | 129.82                     | 129.94                     | 129.90                     | 129.90                     | 130.01                     |
| <b>4</b>         | <b>Tyr</b>                 | <b>Nva(δN<sub>3</sub>)</b> | <b>Prg</b>                 | <b>Tyr</b>                 | <b>Tyr</b>                 | <b>Tyr</b>                 | <b>Nva(δN<sub>3</sub>)</b> | <b>Ala(NMe)</b>            |
| CO               | 175.45                     | 175.06                     | 172.63                     | 173.79                     | 173.67                     | 173.78                     | 175.99                     | 175.53                     |
| C <sup>α</sup>   | 57.65                      | 55.41                      | 54.31                      | 57.41                      | 56.20                      | 57.50                      | 55.52                      | 53.37                      |
| C <sup>β</sup>   | 28.90                      | 32.10                      | 30.04                      | 39.17                      | 39.30                      | 39.11                      | 32.01                      | 15.97                      |
| C <sup>γ</sup>   | 131.00                     | 28.04                      | 144.78                     | 130.37                     | 130.44                     | 130.39                     | 28.05                      | --                         |
| C <sup>δ</sup>   | 133.42                     | 53.04                      | 128.55                     | 133.21                     | 133.26                     | 133.20                     | 52.84                      | --                         |
| C <sup>ε</sup>   | 118.37                     | --                         | --                         | 118.08                     | 117.97                     | 117.94                     | --                         | --                         |
| C <sup>ζ</sup>   | 157.36                     | --                         | --                         | 157.23                     | 157.12                     | 157.07                     | --                         | --                         |
| NMe              | --                         | --                         | --                         | --                         | --                         | --                         | --                         | 34.67                      |
| <b>5</b>         | <b>Thr</b>                 | <b>Thr</b>                 | <b>Thr</b>                 | <b>Nva(δN<sub>3</sub>)</b> | <b>Nva(δN<sub>3</sub>)</b> | <b>Nva(δN<sub>3</sub>)</b> | <b>Thr</b>                 | <b>Nva(δN<sub>3</sub>)</b> |
| CO               | 172.42                     | 171.76                     | 172.10                     | 173.24                     | 172.83                     | 172.96                     | 171.77                     | 175.29                     |
| C <sup>α</sup>   | 58.47                      | 61.35                      | 58.84                      | 52.40                      | 52.63                      | 52.21                      | 61.37                      | 54.24                      |
| C <sup>β</sup>   | 70.01                      | 67.56                      | 71.03                      | 29.74                      | 31.30                      | 29.65                      | 67.56                      | 29.65                      |
| C <sup>γ</sup>   | 21.68                      | 22.11                      | 20.37                      | 27.70                      | 27.20                      | 27.63                      | 22.09                      | 27.46                      |
| C <sup>δ</sup>   | --                         | --                         | --                         | 52.38                      | 52.19                      | 52.96                      | --                         | 52.45                      |
| <b>6</b>         | <b>Pro</b>                 | <b>Pro</b>                 | <b>Pro</b>                 | <b>Pro</b>                 | <b>Pro</b>                 | <b>Pro</b>                 | <b>Pro</b>                 | <b>Pro</b>                 |
| CO               | 176.30                     | 175.99                     | 175.74                     | 176.35                     | 174.96                     | 176.51                     | 176.05                     | 176.26                     |
| C <sup>α</sup>   | 62.36                      | 64.92                      | 63.39                      | 62.50                      | 63.16                      | 62.55                      | 64.93                      | 62.65                      |
| C <sup>β</sup>   | 34.50                      | 31.63                      | 34.50                      | 30.46                      | 31.98                      | 30.60                      | 31.62                      | 30.75                      |
| C <sup>γ</sup>   | 25.06                      | 28.04                      | 24.64                      | 27.31                      | 27.26                      | 27.33                      | 28.11                      | 27.91                      |
| C <sup>δ</sup>   | 50.52                      | 50.10                      | 49.85                      | 50.44                      | 50.70                      | 50.41                      | 50.11                      | 50.73                      |
| <b>7</b>         | <b>Nle(εN<sub>3</sub>)</b> | <b>Prg</b>                 | <b>Nva(δN<sub>3</sub>)</b> | <b>Prg</b>                 | <b>Gly</b>                 | <b>Prg</b>                 | <b>Prg</b>                 | <b>Prg</b>                 |
| CO               | 176.45                     | n.d.                       | 175.34                     | 175.23                     | 169.51                     | 175.03                     | 170.53                     | 174.68                     |
| C <sup>α</sup>   | 56.60                      | 56.01                      | 55.34                      | 54.47                      | 46.12                      | 54.14                      | 56.16                      | 54.27                      |
| C <sup>β</sup>   | 32.71                      | 29.46                      | 30.59                      | 30.79                      | --                         | 30.60                      | 29.44                      | 30.31                      |
| C <sup>γ</sup>   | 25.17                      | n.d.                       | 28.13                      | 146.58                     | --                         | 145.85                     | 145.52                     | n.d.                       |
| C <sup>δ</sup>   | 30.69                      | n.d.                       | 50.64                      | 125.95                     | --                         | 126.75                     | 127.48                     | n.d.                       |
| C <sup>ε</sup>   | 53.23                      | --                         | --                         | --                         | --                         | --                         | --                         | --                         |
| <b>8</b>         | <b>Thr</b>                 | <b>Thr</b>                 | <b>Thr</b>                 | <b>Thr</b>                 | <b>Prg</b>                 | <b>Thr</b>                 | <b>Thr</b>                 | <b>Thr</b>                 |
| CO               | 177.62                     | 177.23                     | 176.33                     | 176.82                     | 178.10                     | 176.24                     | 177.23                     | 176.56                     |
| C <sup>α</sup>   | 60.76                      | 61.09                      | 61.18                      | 61.40                      | 57.51                      | 60.86                      | 60.99                      | 61.22                      |
| C <sup>β</sup>   | 70.24                      | 70.06                      | 69.80                      | 69.99                      | 29.56                      | 69.73                      | 70.12                      | 69.93                      |
| C <sup>γ</sup>   | 21.76                      | 21.58                      | 21.63                      | 21.71                      | 133.70                     | 21.56                      | 21.60                      | 21.68                      |
| C <sup>δ</sup>   | --                         | --                         | --                         | --                         | 125.90                     | --                         | --                         | --                         |

**Supplementary Table S8. The numbers of observed NOE peaks, additional constraints and structural statistics for calculated structures of analogue 8.**

|                                                      | Analogue 8* pH 1.9 |            | Analogue 8* pH 8 |            |
|------------------------------------------------------|--------------------|------------|------------------|------------|
| <i>Non-redundant distance and angle</i>              |                    |            |                  |            |
| Total number of NOE constraints                      | 840                |            | 477              |            |
| Short-range NOEs                                     |                    |            |                  |            |
| Intra-residue (i = j)                                | 218                |            | 135              |            |
| Sequential ( i - j  = 1)                             | 237                |            | 114              |            |
| Medium-range NOEs (1 <  i - j  < 5)                  | 184                |            | 95               |            |
| Long-range NOEs ( i - j  ≥ 5)                        | 198                |            | 130              |            |
| Torsion angles                                       | 52                 |            | -                |            |
| Hydrogen bond restrains                              | 49                 |            | 30               |            |
| Total number of restricting constraints              | 941                |            |                  |            |
| Total restricting constraints per restrained residue | 19.2               |            | 11.0             |            |
| <i>Residual constraint violations</i>                |                    |            |                  |            |
| Distance violations per structure                    |                    |            |                  |            |
| 0.1 – 0.2 Å                                          | 11.25              |            | 9.47             |            |
| 0.2 – 0.5 Å                                          | 4.69               |            | 6.33             |            |
| > 0.5 Å                                              | 0                  |            | 0                |            |
| r.m.s. of distance violation per                     | 0.04 Å             |            | 0.06 Å           |            |
| Maximum distance violation                           | 0.50 Å             |            | 0.50 Å           |            |
| Dihedral angle violations per structure              |                    |            |                  |            |
| 1 – 10 °                                             | 0.97               |            | -                |            |
| > 10 °                                               | 0                  |            | -                |            |
| r.m.s. of dihedral violations per                    | 0.48 °             |            | -                |            |
| Maximum dihedral angle violation                     | 5.00 °             |            | -                |            |
| <i>Ramachandran plot summary from</i>                |                    |            |                  |            |
| Most favoured regions                                | 96.3 %             |            | 90.9 %           |            |
| Additionally allowed regions                         | 3.7 %              |            | 8.7 %            |            |
| Generously allowed regions                           | 0.0 %              |            | 0.3 %            |            |
| Disallowed regions                                   | 0.0 %              |            | 0.1 %            |            |
| <i>r.m.s.d. to the mean structure</i>                | <i>ordered</i>     | <i>all</i> | <i>ordered</i>   | <i>all</i> |
| All backbone atoms                                   | 0.9 Å              | 1.2 Å      | 0.5 Å            | 1.0 Å      |
| All heavy atoms                                      | 1.2 Å              | 1.5 Å      | 0.9 Å            | 1.5 Å      |

\*Analogue 8: Cyclo[G<sup>B23</sup>FF-Nva(δN<sub>3</sub>)-TP-Prg-T<sup>B30</sup>]-insulin

**Supplementary Table S9. The numbers of observed NOE peaks, additional constraints and structural statistics for calculated structures of analogue 12.**

| Analogue 12* pH 1.9                                  |                |                     |
|------------------------------------------------------|----------------|---------------------|
| <i>Non-redundant distance and angle</i>              |                |                     |
| Total number of NOE constraints                      | 894            |                     |
| Short-range NOEs                                     |                |                     |
| Intra-residue (i = j)                                | 227            |                     |
| Sequential ( i - j  = 1)                             | 225            |                     |
| Medium-range NOEs (1 <  i - j  < 5)                  | 218            |                     |
| Long-range NOEs ( i - j  ≥ 5)                        | 221            |                     |
| Torsion angles                                       | -              |                     |
| Hydrogen bond restrains                              | 64             |                     |
| Total number of restricting constraints              |                |                     |
| Total restricting constraints per restrained residue | 19.6           |                     |
| <i>Residual constraint violations</i>                |                |                     |
| Distance violations per structure                    |                |                     |
| 0.1 – 0.2 Å                                          | 7.17           |                     |
| 0.2 – 0.5 Å                                          | 3.03           |                     |
| > 0.5 Å                                              | 0              |                     |
| r.m.s. of distance violation per                     | 0.03 Å         |                     |
| Maximum distance violation                           | 0.50 Å         |                     |
| Dihedral angle violations per structure              |                |                     |
| 1 – 10 °                                             | -              |                     |
| > 10 °                                               | -              |                     |
| r.m.s. of dihedral violations per                    | -              |                     |
| Maximum dihedral angle violation                     | -              |                     |
| <i>Ramachandran plot summary from</i>                |                |                     |
| Most favoured regions                                | 88.7 %         |                     |
| Additionally allowed regions                         | 11.1 %         |                     |
| Generously allowed regions                           | 0.3 %          |                     |
| Disallowed regions                                   | 0.0 %          |                     |
| <i>r.m.s.d. to the mean structure</i>                | <i>ordered</i> | <i>all residues</i> |
| All backbone atoms                                   | 0.3 Å          | 0.5 Å               |
| All heavy atoms                                      | 0.7 Å          | 0.8 Å               |

\* Analogue 12: Cyclo[G<sup>B23</sup>-G-FY-Nva(δN<sub>3</sub>)-P-Prg-T<sup>B30</sup>]-insulin

**Supplementary Table 10. Data collection and refinement statistics for analogues 2, 10 and 11.**

|                                                     | Analogue 2*                          | Analogue 10*            | Analogue 11**          |
|-----------------------------------------------------|--------------------------------------|-------------------------|------------------------|
| Space group                                         | <i>P2<sub>1</sub>2<sub>1</sub>2</i>  | <i>C2</i>               | <i>P3<sub>1</sub></i>  |
| Cell dimensions                                     |                                      |                         |                        |
| <i>a</i> , <i>b</i> , <i>c</i> (Å)                  | 55.44 56.86 60.00                    | 66.10 45.97 43.93       | 60.99 60.99 81.92      |
| $\alpha$ , $\beta$ , $\gamma$ (°)                   | 90.0 90.0 90.0                       | 90.0 128.5 90.0         | 90.0 90.0 120.0        |
| Resolution (Å)                                      | 41.28 – 1.70(1.73-1.70) <sup>§</sup> | 34.38 – 1.90(1.94-1.90) | 50.0 – 1.54(1.57-1.54) |
| <i>R</i> <sub>sym</sub>                             | 0.070(0.253)                         | 0.059(0.42)             | 0.068(0.488)           |
| $\langle I / \sigma(I) \rangle$                     | 15.7(4.3)                            | 12.7(3.0)               | 15.2(3.5)              |
| Completeness (%)                                    | 92.6(60.5)                           | 97.7(92.7)              | 100.0(100.0)           |
| <b>Refinement</b>                                   |                                      |                         |                        |
| Resolution (Å)                                      | 60.01 - 1.70                         | 34.38 – 1.90            | 50.0 – 1.54            |
| No. reflections                                     | 18898                                | 7579                    | 13606                  |
| <i>R</i> <sub>work</sub> / <i>R</i> <sub>free</sub> | 0.196/0.232                          | 0.235/0.304             | 0.161/0.195            |
| No. atoms                                           | 1606                                 | 899                     | 2913                   |
| Protein                                             | 1391                                 | 805                     | 2464                   |
| Ligand/ion                                          | 15                                   | -                       | 70/4                   |
| Water                                               | 200                                  | 94                      | 375                    |
| <i>B</i> -factors                                   |                                      |                         |                        |
| Protein                                             | 19.46                                | 24.61                   | 18.55                  |
| Ligand/ion                                          | 37.71                                | -                       | 14.65/10.0             |
| Water                                               | 30.21                                | 26.10                   | 31.19                  |
| R.m.s. deviations                                   |                                      |                         |                        |
| Bond lengths (Å)                                    | 0.019                                | 0.020                   | 0.025                  |
| Bond angles (°)                                     | 2.36                                 | 2.30                    | 2.23                   |

Analogue 2: Cyclo[G<sup>B23</sup>-Prg-FYTP-Nle(εN<sub>3</sub>)-T<sup>B30</sup>]-insulin

Analogue 10: Cyclo[G<sup>B23</sup>FFY-Nva(δN<sub>3</sub>)-P-Prg-T<sup>B30</sup>]-insulin

Analogue 11: Cyclo[G<sup>B23</sup>FFY-Nva(δN<sub>3</sub>)-P-G-Prg<sup>B30</sup>]-insulin

\*DLS – Diamond Light Source, Didcot, UK, \*\*ESRF – European Synchrotron Radiation Facility, Grenoble, France; <sup>§</sup>Values in parentheses are for highest-resolution shell; All X-ray data were collected on one crystal only.
